# Supplementary material for: Effects of quarantine on Physical Activity prevalence in Italian Adults: a pilot study
Source: PeerJ. 2022 Oct 3;10:e14123. doi: 10.7717/peerj.14123 (PMC9536321; doi:10.7717/peerj.14123)
Supplement: Supplemental Information 1 — All the collected and processed data described in the tables and figures. [file peerj-10-14123-s001.xls]

## Sheet: Sheet1
Sex	Age	Age categories	Education	Occupation	Did you practice PA and/or sports before COVID-19 quarantine?	Did you practice PA and/or sports during COVID-19 lockdown?	Why did not you practice PA and/or sports during COVID-19 lockdown?	Why did you practice PA and/or sports during COVID-19 lockdown?	Did you practice PA and/or sports after COVID-19 lockdown?	Why did not you practice PA and/or sports after COVID-19 lockdown?	PAH1	PAA2	PAA3	PAH4	PAA5	PAA6	PAA7	PAA8	PAA9	PAAP10	PAA11	PAA12	PAA13	PAA2p	PAA3p	PAA5p	PAA6p	PAA7p	PAA8p	PAA9p	PAA10p	PAA11p	PAA12p	PAA13p
M	24	18-39	Degree	Student	Yes	No	Environmental problems		No	Covid19 problems	4	2	3	2	3	4	3	2	3	3	2	3	2	2	3	4	4	3	2	3	3	2	3	2
F	24	18-39	Master's Degree	Student	No	Yes		Physical well-being	No	Socio-Economics problems	3	2	1	4	2	1	2	1	1	2	1	1	1	2	2	2	1	2	1	3	2	1	1	1
F	24	18-39	Master's Degree	Employed	No	Yes		Psychological and Physical well-being	No	Psychological aspects	4	3	3	3	3	4	3	2	3	3	2	2	2	3	3	3	4	4	3	3	3	1	2	2
F	24	18-39	Master's Degree	Freelance	Yes	Yes		Psychological and Physical well-being	Yes		4	4	4	2	3	4	4	2	4	2	3	3	2	4	4	3	4	4	2	4	2	3	3	2
F	22	18-39	Degree	Other	No	Yes		Physical and General well-being	No	Psychological aspects	4	2	3	1	4	3	4	1	4	2	3	1	1	1	3	4	3	4	1	4	2	3	1	1
F	18	18-39	Secondary school	Student	Yes	Yes		Psychological and Physical well-being	Yes		4	3	2	2	3	3	3	2	3	2	2	4	2	3	2	3	3	3	2	3	4	2	4	4
F	23	18-39	Degree	Student	Yes	Yes		Psychological well-being	Yes		4	4	4	2	4	4	4	4	4	1	4	1	1	4	4	4	4	4	4	4	1	1	1	1
F	20	18-39	High School	Student	Yes	Yes		Psychological well-being	Yes		4	3	4	3	3	3	4	2	3	2	4	2	2	3	1	3	3	4	2	2	2	4	2	2
F	23	18-39	Degree	Student	Yes	Yes		Psychological and Physical well-being	Yes		4	3	3	2	3	4	4	1	4	1	2	3	1	3	3	3	4	4	1	4	1	2	2	1
F	23	18-39	Degree	Student	No	Yes		Psychological and General well-being	Yes		4	3	3	3	3	4	4	2	3	1	4	1	2	3	3	3	4	4	2	3	1	1	1	2
F	24	18-39	Master's Degree	Freelance	Yes	Yes		Physical well-being	Yes		4	4	3	3	4	4	4	2	2	2	2	3	2	4	3	4	2	4	2	2	2	2	3	2
F	23	18-39	Master's Degree	Student	Yes	Yes		Psychological and General well-being	Yes		4	4	4	2	3	3	3	1	4	1	1	1	1	4	2	3	3	3	1	4	1	1	2	1
M	23	18-39	Master's Degree	Freelance	Yes	Yes		Physical and General well-being	Yes		4	4	4	2	4	4	4	1	4	1	4	1	1	4	4	4	4	4	2	4	1	4	1	1
F	20	18-39	High School	Student	Yes	Yes		Psychological and Physical well-being	Yes		4	3	3	1	3	4	4	1	3	1	2	2	1	3	3	1	4	4	1	3	1	2	2	2
F	18	18-39	Secondary school	Student	Yes	No	Environmental problems		Yes		4	4	4	1	3	4	4	2	4	1	3	1	1	3	4	3	4	3	2	4	1	4	1	1
F	18	18-39	Secondary school	Student	Yes	Yes		Psychological well-being	Yes		4	4	2	3	4	4	4	1	2	3	2	3	1	4	2	4	4	4	1	2	3	2	3	1
F	21	18-39	Degree	Student	Yes	Yes		Psychological well-being	No	Psychological aspects	4	3	4	2	3	4	4	1	4	1	2	1	1	3	4	3	2	1	1	4	1	2	2	1
F	22	18-39	Degree	Other	Yes	Yes		Psychological and General well-being	Yes		4	4	4	3	3	4	4	2	4	2	3	3	1	4	4	3	4	4	1	1	2	3	3	4
F	24	18-39	Master's Degree	Employed	Yes	Yes		Psychological and Physical well-being	Yes		4	3	3	3	3	4	4	2	3	3	3	4	2	3	3	2	2	4	2	3	3	1	4	2
F	18	18-39	Secondary school	Student	Yes	Yes		Psychological and Physical well-being	No	Psychological aspects	4	3	1	2	3	4	4	3	2	2	4	2	1	3	1	3	4	4	3	2	2	4	2	1
F	21	18-39	High School	Student	No	Yes		Psychological well-being	Yes		4	2	2	3	2	4	4	3	2	2	4	4	2	2	3	2	4	4	2	2	2	4	4	2
F	18	18-39	Secondary school	Student	Yes	Yes		Psychological and Physical well-being	No	Psychological aspects	4	3	1	2	3	4	4	3	2	2	4	2	1	3	1	3	4	4	1	2	3	4	2	1
F	23	18-39	Master's Degree	Other	No	Yes		Psychological and Physical well-being	Yes		4	3	3	3	2	4	4	1	3	1	2	3	2	3	3	2	2	4	1	3	1	2	1	2
F	19	18-39	High School	Student	No	Yes		Physical well-being	No	Socio-Economics problems	4	3	3	3	3	4	3	2	3	1	4	2	2	2	3	3	4	3	2	3	1	4	2	1
F	23	18-39	Master's Degree	Other	No	Yes		Psychological and General well-being	Yes		4	3	3	4	1	3	4	2	4	2	3	4	2	3	3	1	3	4	2	3	2	2	2	2
F	22	18-39	Master's Degree	Other	Yes	Yes		Psychological and General well-being	Yes		4	4	4	3	3	4	4	2	4	2	3	3	1	4	4	4	4	4	2	4	2	3	3	1
M	24	18-39	Master's Degree	Other	No	No	Environmental problems		No	Psychological aspects	3	3	3	2	2	4	4	2	2	2	3	2	2	3	3	2	4	4	2	2	2	3	2	2
M	23	18-39	Degree	Student	Yes	Yes		Psychological and Physical well-being	Yes		4	3	3	3	2	3	3	1	3	1	2	3	1	3	3	2	3	3	1	3	1	2	3	1
F	24	18-39	Master's Degree	Other	Yes	Yes		Psychological well-being	Yes		4	4	4	2	4	4	3	2	4	1	4	2	2	4	4	4	4	3	2	4	1	4	2	2
F	21	18-39	High School	Student	No	Yes		Psychological well-being	No	Environmental problems	4	3	4	2	3	4	3	2	3	2	4	3	1	3	4	3	4	3	2	3	2	4	3	2
M	22	18-39	High School	Student	Yes	No	Psycho-social aspects		Yes		4	3	4	2	3	3	4	2	2	3	2	1	1	3	4	3	3	4	2	2	3	2	1	1
F	23	18-39	High School	Student	Yes	Yes		Psychological well-being	Yes		4	4	4	2	4	4	4	4	4	1	4	1	1	4	4	4	4	4	4	4	1	4	1	1
M	24	18-39	High School	Student	Yes	Yes		Psychological and Physical well-being	Yes		3	3	3	3	3	3	3	2	2	1	3	3	2	3	2	3	4	3	2	2	1	3	3	2
F	23	18-39	Degree	Student	No	No	Psycho-social aspects		No	Psychological aspects	4	3	3	2	3	3	4	1	3	2	3	2	1	3	3	3	3	4	1	3	2	3	2	1
F	24	18-39	High School	Student	Yes	Yes		Psychological and Physical well-being	Yes		4	3	3	3	3	4	4	2	3	3	3	4	2	3	3	3	4	4	2	3	3	3	4	2
F	22	18-39	High School	Student	Yes	Yes		Psychological and Physical well-being	Yes		4	3	3	3	4	4	4	3	3	2	3	2	1	3	3	4	4	4	3	3	2	3	2	1
M	21	18-39	High School	Student	Yes	Yes		Physical and General well-being	Yes		4	3	2	3	3	2	3	4	1	3	2	3	2	1	2	2	2	3	4	1	3	2	3	2
M	24	18-39	Degree	Student	Yes	Yes		Psychological well-being	Yes		4	4	4	2	4	4	4	1	3	1	3	2	1	4	4	4	4	4	1	3	1	3	2	1
M	23	18-39	Degree	Student	No	Yes		Psychological and General well-being	No	Psychological aspects	4	3	4	2	3	4	4	1	3	3	2	2	1	3	4	3	4	4	1	3	3	2	2	1
M	24	18-39	Degree	Student	Yes	Yes		Physical and General well-being	Yes		4	4	4	2	4	4	4	1	4	1	3	2	1	4	4	4	4	4	1	4	4	3	2	1
F	23	18-39	Master's Degree	Other	Yes	Yes		Psychological and General well-being	Yes		4	3	4	2	3	2	4	1	3	2	2	2	2	3	4	3	2	3	1	3	2	2	2	2
F	22	18-39	Master's Degree	Freelance	Yes	Yes		Psychological and Physical well-being	Yes		3	2	2	3	3	3	3	1	3	1	1	2	1	2	2	3	3	3	1	2	1	1	2	1
F	23	18-39	Master's Degree	Freelance	No	Yes		General well-being	No	Psychological aspects	4	2	3	3	3	3	4	2	3	3	3	3	2	2	3	3	3	4	2	3	3	3	3	2
M	24	18-39	Master's Degree	Employed	Yes	Yes		Psychological well-being	Yes		4	4	4	4	4	4	4	4	4	1	2	2	2	4	4	4	4	4	4	4	1	2	2	2
F	24	18-39	Master's Degree	Employed	No	Yes		Psychological and General well-being	No	Psychological aspects	4	3	3	3	2	3	3	2	3	3	3	3	2	3	3	2	3	3	2	3	3	3	3	2
F	18	18-39	Secondary school	Student	Yes	Yes		Psychological and Physical well-being	No	Psychological aspects	4	4	4	3	3	4	4	2	3	3	2	3	2	4	4	3	4	4	2	3	3	2	3	2
F	24	18-39	Master's Degree	Other	No	Yes		Psychological and Physical well-being	Yes		4	3	3	4	4	4	3	2	3	2	3	3	2	3	3	4	4	3	2	3	2	3	3	1
F	24	18-39	Master's Degree	Unemployed	Yes	No	Psycho-social aspects		Yes		4	4	4	2	3	3	3	2	3	1	3	2	2	1	4	3	3	3	2	3	1	3	2	2
F	23	18-39	High School	Student	Yes	Yes		Psychological well-being	No	Psychological aspects	4	3	3	2	3	3	3	2	1	2	2	3	1	3	3	3	3	3	2	3	2	2	3	1
F	21	18-39	High School	Student	Yes	No	Psycho-social aspects		Yes		4	3	3	2	3	4	4	2	3	3	2	3	2	3	3	3	4	4	2	3	3	2	3	2
F	24	18-39	Master's Degree	Employed	Yes	Yes		Psychological well-being	Yes		4	4	3	4	3	3	4	2	2	2	3	3	2	4	3	3	3	4	2	2	2	3	3	2
F	23	18-39	High School	Student	Yes	Yes		Psychological and Physical well-being	Yes		4	3	3	2	3	3	3	2	3	2	2	2	2	3	3	3	3	3	2	3	2	2	2	2
F	22	18-39	High School	Student	Yes	Yes		Psychological and Physical well-being	Yes		4	3	4	2	3	3	4	1	4	2	3	1	1	3	4	4	3	4	1	4	2	4	3	1
M	23	18-39	High School	Student	Yes	Yes		Psychological well-being	Yes		4	3	4	2	3	3	3	1	3	2	2	2	3	3	4	3	3	3	1	2	2	2	2	3
F	21	18-39	High School	Student	Yes	Yes		Psychological well-being	Yes		4	3	3	3	3	4	4	3	3	1	2	3	2	3	3	3	4	2	3	3	1	2	3	2
F	19	18-39	High School	Student	No	Yes		Psychological and Physical well-being	Yes		4	3	3	3	3	4	4	2	2	2	2	3	2	3	1	3	4	4	2	2	2	2	3	2
F	20	18-39	High School	Student	No	Yes		Physical well-being	Yes		3	2	3	2	2	3	3	2	2	3	2	2	2	2	3	2	3	3	2	2	3	2	2	2
F	23	18-39	Degree	Student	Yes	Yes		Psychological well-being	Yes		4	4	4	2	4	4	4	2	4	2	2	2	2	4	4	4	4	4	2	4	3	2	2	3
M	24	18-39	Master's Degree	Employed	No	No	Environmental problems		No	Psychological aspects	3	3	3	2	2	4	4	2	2	2	3	2	2	3	3	2	3	4	2	2	2	3	2	2
F	19	18-39	High School	Student	Yes	Yes		Psychological and Physical well-being	Yes		4	4	3	2	4	3	4	2	3	1	3	4	2	1	3	4	3	4	2	3	1	3	4	2
F	23	18-39	Master's Degree	Other	No	No	Psycho-social aspects		No	Psychological aspects	4	3	3	2	3	4	4	2	3	2	3	2	2	3	3	3	4	4	2	3	2	3	2	2
F	19	18-39	High School	Other	Yes	Yes		Psychological and Physical well-being	No	Socio-Economics problems	4	3	2	4	3	3	4	3	2	3	2	2	2	3	2	3	3	4	3	2	3	2	2	2
F	18	18-39	Secondary school	Other	Yes	No	Psycho-social aspects		No	Psychological aspects	4	4	3	1	3	4	4	1	3	2	4	2	2	4	3	3	4	4	3	3	3	4	2	2
F	24	18-39	Master's Degree	Other	No	Yes		Psychological well-being	No	Socio-Economics problems	4	3	3	2	3	4	4	2	4	2	2	2	2	3	3	3	4	4	2	4	2	2	2	2
M	24	18-39	Master's Degree	Other	Yes	Yes		Psychological and Physical well-being	Yes		4	4	4	2	4	4	4	2	4	1	3	3	2	4	4	4	4	4	2	4	1	3	3	2
M	24	18-39	Master's Degree	Other	Yes	No	Environmental problems		No	Covid19 problems	4	4	3	1	3	4	4	1	4	4	2	2	2	4	4	3	2	4	1	4	4	2	2	2
F	18	18-39	Secondary school	Student	Yes	Yes		Psychological and Physical well-being	Yes		4	3	3	2	3	3	4	2	2	2	3	3	1	3	3	3	3	4	2	2	2	3	3	1
F	24	18-39	Master's Degree	Unemployed	Yes	Yes		Psychological and General well-being	Yes		4	3	3	2	3	3	3	1	3	2	2	2	1	3	3	3	3	1	3	3	2	2	2	1
F	22	18-39	High School	Student	Yes	Yes		Psychological and Physical well-being	Yes		4	3	3	2	3	3	4	1	3	1	3	3	1	3	3	3	3	4	1	3	1	3	3	1
F	21	18-39	High School	Student	Yes	Yes		Psychological and General well-being	No	Health problems	4	4	4	2	3	4	4	2	4	2	3	4	2	4	4	3	4	4	3	4	2	3	4	2
F	23	18-39	High School	Student	Yes	Yes		Psychological and Physical well-being	Yes		4	4	3	4	3	4	4	2	3	1	3	2	2	4	1	3	4	4	2	3	1	3	2	2
F	19	18-39	High School	Student	No	Yes		Psychological and Physical well-being	Yes		4	3	3	3	3	4	4	2	2	2	2	3	2	3	3	3	4	4	2	2	2	2	3	2
F	23	18-39	Degree	Student	Yes	Yes		Psychological well-being	Yes		4	4	4	2	4	4	4	1	4	1	3	3	1	4	4	4	4	4	1	4	1	3	3	4
F	22	18-39	High School	Student	Yes	Yes		Psychological and General well-being	Yes		4	3	3	2	3	4	4	2	4	2	2	3	2	1	3	3	4	4	2	4	2	2	3	2
F	27	18-39	Degree	Unemployed	No	No	Environmental problems		No	Psychological aspects	3	3	4	1	3	4	4	1	4	1	2	2	2	1	4	2	4	4	1	4	1	2	2	2
F	39	18-39	Degree	Freelance	Yes	Yes		Psychological and General well-being	Yes		4	4	3	2	4	4	4	1	3	2	4	3	2	4	3	4	4	2	1	3	2	4	3	2
M	29	18-39	High School	Other	Yes	Yes		Psychological and General well-being	No	Covid19 problems	4	3	3	3	2	3	3	2	4	2	3	2	2	3	3	2	3	3	2	4	2	3	2	2
F	26	18-39	Degree	Student	Yes	Yes		Psychological and Physical well-being	Yes		4	3	4	3	3	4	4	2	3	2	2	3	2	3	4	3	4	4	2	3	2	4	3	2
M	30	18-39	Degree	Freelance	Yes	Yes		Physical well-being	Yes		4	2	2	4	2	3	4	2	2	3	3	2	1	2	2	2	3	4	2	1	3	3	2	1
M	29	18-39	Degree	Freelance	Yes	Yes		General well-being	Yes		4	4	4	4	4	4	4	4	4	2	4	3	2	4	4	4	4	4	4	4	2	4	3	2
M	26	18-39	Degree	Student	Yes	Yes		Psychological well-being	Yes		4	4	4	3	4	3	4	2	1	2	2	4	2	4	4	4	3	4	2	1	2	2	4	2
F	29	18-39	High School	Freelance	Yes	Yes		Psychological well-being	Yes		4	4	1	4	2	4	2	1	4	1	4	3	1	4	1	2	4	2	1	4	1	4	3	1
F	29	18-39	High School	Freelance	Yes	No	Environmental problems		No	Psychological aspects	4	4	4	1	4	4	4	2	3	2	3	2	2	4	1	4	4	4	2	3	2	3	2	2
F	28	18-39	High School	Employed	Yes	No	Environmental problems		Yes		4	3	4	2	4	4	3	1	4	1	2	2	1	3	4	4	4	3	1	4	1	2	2	1
F	34	18-39	High School	Employed	Yes	Yes		Psychological well-being	No	Health problems	4	4	4	2	3	4	4	4	4	2	4	3	3	4	4	3	4	4	2	4	2	4	3	3
F	37	18-39	High School	Unemployed	Yes	Yes		Psychological and General well-being	Yes		4	4	4	2	4	4	4	2	4	1	2	3	1	4	4	4	3	4	2	2	1	2	1	1
F	31	18-39	High School	Employed	Yes	No	Health problems		No	Health problems	4	3	3	2	3	3	3	2	3	1	3	1	1	3	3	3	3	3	2	3	1	3	1	1
F	30	18-39	Master's Degree	Freelance	No	No	Environmental problems		No	Psychological aspects	4	3	3	2	3	3	3	1	3	3	2	3	2	4	3	3	3	3	1	3	3	2	3	2
F	31	18-39	Degree	Freelance	Yes	No	Environmental problems		No	Covid19 problems	4	4	4	2	3	4	3	2	3	2	4	2	2	4	4	3	4	3	2	3	1	1	2	2
M	38	18-39	Degree	Employed	No	No	Psycho-social aspects		Yes		4	3	4	2	2	4	4	1	4	2	3	3	2	3	4	2	4	4	1	4	2	3	3	2
F	30	18-39	Degree	Freelance	No	No	Environmental problems		Yes		4	3	3	2	3	4	4	1	2	2	3	3	2	3	3	3	4	4	1	2	2	3	3	2
F	36	18-39	Degree	Other	Yes	Yes		Psychological well-being	Yes		4	4	3	2	4	4	4	2	3	1	2	1	2	4	3	4	4	4	2	3	1	2	1	2
M	26	18-39	High School	Student	Yes	Yes		Psychological and General well-being	No	Covid19 problems	4	3	3	2	3	3	3	3	2	3	3	3	3	3	3	3	3	3	3	2	3	3	1	3
F	32	18-39	Master's Degree	Freelance	Yes	Yes		Psychological well-being	Yes		4	3	3	3	3	4	3	2	3	2	2	2	2	3	3	3	4	3	2	3	2	2	2	1
F	33	18-39	High School	Employed	Yes	Yes		Psychological and Physical well-being	No	Health problems	4	4	4	2	2	3	3	1	4	2	4	1	1	1	4	2	3	3	1	4	2	4	1	1
M	26	18-39	High School	Student	Yes	Yes		Psychological and Physical well-being	Yes		4	3	3	1	2	4	4	1	4	2	2	3	2	3	3	2	4	4	1	4	2	2	3	2
M	38	18-39	Degree	Employed	Yes	No	Psycho-social aspects		Yes		4	4	4	2	2	4	3	3	4	2	4	2	1	4	4	2	4	3	3	4	2	4	2	1
F	26	18-39	Degree	Student	Yes	No	Psycho-social aspects		Yes		4	4	4	1	4	4	4	1	4	2	3	3	1	1	4	4	4	4	1	4	2	3	3	1
F	33	18-39	Degree	Freelance	Yes	Yes		Psychological and Physical well-being	Yes		4	4	4	2	4	4	4	1	4	1	4	1	1	4	4	4	4	4	1	4	1	4	1	1
F	31	18-39	Degree	Unemployed	Yes	Yes		Psychological well-being	No	Socio-Economics problems	3	2	2	1	3	3	3	1	4	2	3	2	1	2	2	3	3	3	1	4	2	3	2	1
F	36	18-39	Degree	Freelance	Yes	Yes		Psychological well-being	Yes		4	4	4	2	4	4	4	1	4	1	3	1	1	4	4	4	4	4	1	4	1	2	1	4
F	27	18-39	Degree	Freelance	No	No	Psycho-social aspects		No	Psychological aspects	4	3	4	2	3	4	4	1	3	2	3	2	2	3	1	3	4	4	1	4	2	3	2	2
F	37	18-39	Degree	Other	No	Yes		Psychological and Physical well-being	No	Psychological aspects	4	3	3	2	3	3	3	1	2	2	3	3	3	3	3	3	3	3	1	2	2	3	3	3
M	36	18-39	Master's Degree	Freelance	Yes	Yes		Psychological well-being	Yes		4	4	4	3	3	3	4	2	3	2	3	2	2	4	4	3	4	4	2	3	2	3	2	2
F	31	18-39	Degree	Employed	Yes	No	Environmental problems		No	Environmental problems	4	3	3	2	3	4	4	1	3	2	3	2	1	3	3	3	4	4	1	3	2	3	2	1
M	32	18-39	Master's Degree	Freelance	Yes	Yes		Psychological and Physical well-being	Yes		4	3	2	2	3	3	4	2	2	1	3	2	1	3	2	2	3	4	2	2	1	3	2	1
F	38	18-39	High School	Employed	No	No	Psycho-social aspects		No	Psychological aspects	3	3	4	2	3	3	4	1	3	2	3	2	2	4	4	3	3	4	1	3	2	3	2	2
F	28	18-39	Degree	Unemployed	Yes	Yes		Physical well-being	Yes		4	3	3	2	3	3	3	2	3	2	2	3	2	3	3	3	3	3	2	3	2	2	3	2
F	36	18-39	Degree	Employed	Yes	Yes		Psychological and Physical well-being	Yes		4	3	2	2	3	4	4	1	2	2	3	2	1	3	2	3	4	4	1	2	2	3	2	1
F	31	18-39	Degree	Unemployed	Yes	Yes		Psychological and General well-being	Yes		4	4	4	2	4	4	4	1	4	1	3	2	2	4	4	4	4	4	1	4	1	4	2	2
F	27	18-39	High School	Freelance	No	Yes		Psychological well-being	No	Psychological aspects	4	4	4	2	4	4	3	2	4	2	4	2	1	4	4	4	4	4	2	4	2	4	2	1
F	39	18-39	High School	Employed	No	No	Psycho-social aspects		No	Psychological aspects	4	3	4	2	2	3	3	2	3	3	2	4	2	3	4	2	3	3	2	3	3	2	4	2
F	35	18-39	High School	Employed	No	Yes		Psychological and Physical well-being	No	Psychological aspects	4	3	3	3	3	4	4	1	3	2	1	1	1	4	3	3	4	4	1	3	2	1	1	1
F	39	18-39	High School	Employed	Yes	Yes		Psychological and General well-being	Yes		4	3	4	3	3	3	4	1	3	3	3	2	2	3	4	3	3	4	1	3	3	3	2	2
F	29	18-39	Master's Degree	Freelance	No	No	Psycho-social aspects		No	Psychological aspects	4	3	4	3	3	4	4	2	4	2	4	3	2	3	4	3	4	4	2	4	2	4	3	3
F	32	18-39	Degree	Employed	No	Yes		Psychological and Physical well-being	Yes		4	3	3	3	2	3	4	2	3	2	3	2	2	3	1	2	3	4	1	3	2	3	2	2
M	26	18-39	Degree	Student	No	No	Health problems		No	Psychological aspects	4	3	4	4	2	3	2	2	2	2	2	3	1	3	4	2	3	2	2	2	2	2	3	1
M	35	18-39	Degree	Unemployed	Yes	Yes		Psychological well-being	Yes		3	3	4	2	3	4	4	1	4	2	3	2	2	3	4	3	4	4	1	4	2	1	2	2
F	32	18-39	Degree	Freelance	No	No	Covid19 problems		No	Psychological aspects	3	3	2	2	3	4	4	2	2	2	2	2	2	2	2	3	4	4	2	2	2	2	2	2
F	28	18-39	High School	Freelance	Yes	Yes		Psychological and Physical well-being	Yes		4	3	3	2	3	4	4	1	4	2	3	3	3	3	3	3	4	4	1	4	2	3	3	3
F	38	18-39	Degree	Freelance	Yes	Yes		Psychological well-being	Yes		4	3	3	4	3	4	4	2	3	1	4	2	2	3	3	3	4	4	3	3	1	4	2	2
F	38	18-39	Degree	Freelance	No	No	Psycho-social aspects		No	Psychological aspects	4	3	3	1	2	3	4	2	3	2	3	2	2	2	3	2	3	4	2	3	2	3	2	2
M	30	18-39	High School	Employed	No	Yes		Psychological well-being	No	Psychological aspects	4	3	4	2	3	4	3	2	3	3	3	2	2	3	4	3	4	3	2	3	3	3	2	4
F	28	18-39	High School	Employed	Yes	Yes		Psychological and General well-being	Yes		4	3	4	3	4	4	4	2	4	1	2	2	1	3	2	4	4	4	2	4	1	3	2	1
M	26	18-39	Master's Degree	Employed	No	No	Psycho-social aspects		No	Psychological aspects	3	3	4	1	2	2	4	1	3	1	1	1	1	3	4	2	4	4	4	3	1	2	1	4
M	29	18-39	Degree	Student	No	No	Environmental problems		No	Socio-Economics problems	4	4	3	2	2	4	2	2	3	3	2	2	2	4	3	2	4	2	2	3	3	2	2	2
M	27	18-39	Degree	Freelance	Yes	Yes		Psychological and Physical well-being	Yes		4	3	2	2	3	3	3	2	3	2	3	3	2	3	2	3	3	3	2	3	2	3	3	2
F	27	18-39	Degree	Unemployed	Yes	Yes		Physical well-being	Yes		4	4	4	2	3	3	3	2	3	1	1	3	2	4	4	3	3	3	2	3	1	4	3	2
M	27	18-39	Degree	Freelance	Yes	Yes		Physical and General well-being	Yes		4	4	4	3	3	4	3	2	3	2	3	2	2	1	4	3	4	3	2	3	2	3	2	2
F	31	18-39	Degree	Freelance	Yes	Yes		Psychological and Physical well-being	Yes		4	4	4	4	4	4	4	2	3	2	3	2	1	4	4	4	4	4	2	3	2	3	2	1
M	35	18-39	High School	Employed	Yes	Yes		Psychological and General well-being	Yes		4	3	4	3	3	4	4	2	3	2	3	3	2	4	4	3	4	4	2	3	2	3	1	2
F	31	18-39	High School	Unemployed	Yes	Yes		Psychological and Physical well-being	Yes		4	4	4	2	3	4	4	2	1	1	2	3	1	4	4	3	4	4	2	1	1	2	3	3
F	36	18-39	Degree	Freelance	No	No	Psycho-social aspects		No	Psychological aspects	3	2	3	2	2	3	2	2	3	2	3	1	2	2	3	3	3	2	2	3	2	3	1	2
F	28	18-39	Master's Degree	Unemployed	No	Yes		Physical well-being	No	Psychological aspects	4	2	3	2	2	3	3	2	3	2	1	3	2	1	3	2	3	3	2	3	2	1	1	2
M	38	18-39	Degree	Other	Yes	Yes		Psychological and Physical well-being	Yes		3	3	2	3	2	3	3	2	2	2	2	2	2	3	2	2	3	3	2	2	2	2	2	2
F	38	18-39	Degree	Freelance	Yes	Yes		Psychological well-being	Yes		4	2	3	3	3	4	4	2	2	1	2	1	1	2	3	3	4	4	2	2	1	2	1	1
M	28	18-39	Degree	Employed	No	No	Psycho-social aspects		No	Psychological aspects	4	3	4	2	3	3	2	2	3	4	2	3	2	3	4	3	3	2	2	3	4	2	3	2
M	37	18-39	Degree	Employed	No	No	Psycho-social aspects		No	Psychological aspects	4	2	4	2	3	3	2	2	4	2	3	3	2	2	4	3	3	2	2	4	2	3	3	2
M	33	18-39	High School	Employed	Yes	Yes		Physical well-being	Yes		4	4	3	4	3	4	4	1	2	1	2	3	1	4	3	3	4	4	1	2	1	4	3	1
M	29	18-39	High School	Freelance	No	No	Psycho-social aspects		No	Socio-Economics problems	4	4	4	2	3	4	3	4	2	4	2	2	1	2	4	3	4	3	4	2	4	2	2	1
F	30	18-39	High School	Employed	No	No	Psycho-social aspects		No	Psychological aspects	4	3	4	1	3	4	3	2	4	2	3	2	1	3	4	3	4	4	2	4	2	3	2	1
F	37	18-39	High School	Employed	Yes	No	Health problems		No	Covid19 problems	3	1	1	2	3	3	4	2	2	3	1	3	3	1	1	3	3	4	2	1	3	1	4	3
M	26	18-39	Master's Degree	Employed	Yes	Yes		Physical and General well-being	Yes		4	3	3	3	3	4	4	2	3	1	3	2	2	3	3	1	4	4	2	3	1	3	2	2
F	33	18-39	High School	Employed	Yes	Yes		Psychological and Physical well-being	Yes		4	4	2	3	3	4	4	2	2	1	3	2	1	4	2	3	4	4	2	2	3	3	3	1
F	29	18-39	Degree	Freelance	Yes	Yes		Physical well-being	Yes		4	3	3	2	3	4	4	2	3	2	3	2	2	3	3	3	4	4	2	3	2	3	2	2
F	31	18-39	Degree	Employed	No	Yes		Psychological and Physical well-being	No	Psychological aspects	4	4	4	3	3	4	3	1	4	2	4	3	2	4	1	3	4	3	1	4	2	4	3	4
F	26	18-39	Degree	Freelance	Yes	Yes		Psychological and General well-being	Yes		4	4	4	3	4	4	4	2	4	1	2	4	2	4	4	4	1	4	2	4	1	2	4	2
F	29	18-39	Degree	Freelance	No	No	Environmental problems		No	Environmental problems	4	2	3	2	3	4	4	3	3	2	3	2	2	2	3	3	4	1	3	3	2	4	2	2
F	27	18-39	High School	Freelance	Yes	Yes		Psychological and Physical well-being	Yes		4	4	3	3	3	4	4	1	3	2	3	2	1	4	3	3	4	1	1	3	2	3	2	1
M	39	18-39	High School	Employed	Yes	Yes		Psychological and General well-being	Yes		4	4	4	3	3	4	4	2	2	2	2	3	2
M	28	18-39	High School	Employed	Yes	Yes		Physical and General well-being	Yes		4	4	4	2	3	4	4	2	4	1	2	1	1
M	36	18-39	High School	Employed	Yes	Yes		Psychological and General well-being	Yes		4	3	3	2	3	4	4	2	3	2	3	2	2
M	30	18-39	Master's Degree	Employed	No	Yes		Psychological well-being	No	Psychological aspects	4	3	4	2	3	4	3	2	3	3	3	2	2
F	28	18-39	High School	Employed	Yes	No	Psycho-social aspects		Yes		4	4	4	1	4	4	4	1	4	1	3	2	2
M	30	18-39	Master's Degree	Employed	No	No	Psycho-social aspects		No	Psychological aspects	3	3	3	2	3	3	3	2	3	2	3	2	2
M	36	18-39	High School	Employed	Yes	No	Psycho-social aspects		No	Environmental problems	3	3	3	2	3	4	4	2	3	2	2	2	2
F	26	18-39	Degree	Freelance	Yes	Yes		Physical and General well-being	No	Health problems	4	3	3	2	3	4	3	2	4	3	2	2	2
F	34	18-39	Degree	Freelance	No	No	Psycho-social aspects		No	Covid19 problems	3	4	4	1	4	4	4	1	3	1	4	2	1
F	30	18-39	Degree	Employed	Yes	Yes		Psychological well-being	Yes		4	4	4	3	4	4	4	2	3	2	3	4	2
F	32	18-39	Degree	Employed	No	Yes		Psychological well-being	No	Socio-Economics problems	4	4	2	3	1	2	2	2	2	3	2	1	2
M	30	18-39	Master's Degree	Employed	No	No	Environmental problems		No	Psychological aspects	4	2	3	2	2	3	4	2	3	3	1	3	3
M	26	18-39	High School	Student	Yes	Yes		Physical and General well-being	Yes		4	3	3	3	3	4	4	2	2	2	3	2	2
M	27	18-39	Degree	Employed	Yes	Yes		Psychological and Physical well-being	Yes		4	4	4	2	3	4	3	1	3	1	2	3	1
F	26	18-39	Degree	Employed	Yes	Yes		Psychological and Physical well-being	Yes		4	4	4	2	4	4	4	2	4	1	3	2	1
M	27	18-39	Degree	Employed	Yes	Yes		General well-being	Yes		4	4	4	2	3	4	4	2	1	1	3	1	1
F	34	18-39	High School	Employed	No	No	Psycho-social aspects		No	Socio-Economics problems	3	2	2	2	2	3	3	1	2	3	2	1	2
F	37	18-39	Master's Degree	Freelance	No	No	Psycho-social aspects		No	Psychological aspects	4	1	4	1	4	4	4	4	4	1	2	3	3
M	39	18-39	High School	Employed	No	Yes		Psychological and Physical well-being	No	Socio-Economics problems	3	4	4	2	3	4	4	2	2	2	3	2	1
M	39	18-39	Master's Degree	Freelance	Yes	Yes		Psychological and Physical well-being	Yes		4	3	3	2	1	3	2	1	4	1	4	1	1
M	32	18-39	High School	Unemployed	Yes	Yes		Psychological well-being	Yes		4	4	4	2	4	4	3	1	3	1	2	1	1
M	29	18-39	High School	Freelance	Yes	Yes		Psychological well-being	Yes		4	3	4	2	3	3	4	1	3	1	3	2	1
F	30	18-39	Degree	Employed	Yes	Yes		Physical and General well-being	Yes		4	4	4	2	4	4	4	2	4	2	3	3	2
F	26	18-39	High School	Student	Yes	Yes		Psychological well-being	Yes		4	4	4	4	3	3	3	1	1	2	2	4	2
F	30	18-39	Degree	Freelance	No	No	Psycho-social aspects		No	Psychological aspects	4	2	4	2	2	3	4	2	3	1	2	3	1
F	27	18-39	High School	Freelance	Yes	Yes		Psychological well-being	Yes		4	4	3	3	3	4	2	1	4	2	3	2	1
M	34	18-39	Master's Degree	Employed	Yes	Yes		Psychological and Physical well-being	Yes		4	3	3	3	3	4	4	2	3	4	3	2	2
F	29	18-39	High School	Freelance	Yes	Yes		Psychological and General well-being	Yes		4	3	3	3	3	3	4	2	3	2	3	2	2
F	34	18-39	High School	Employed	Yes	No	Environmental problems		Yes		4	4	3	1	3	4	4	1	3	1	3	2	1
M	26	18-39	High School	Employed	Yes	Yes		Psychological and Physical well-being	Yes		4	3	4	2	3	4	3	1	3	1	2	3	1
F	34	18-39	High School	Employed	Yes	No	Environmental problems		Yes		4	3	3	2	3	4	3	2	3	2	3	2	2
M	39	18-39	Master's Degree	Employed	No	Yes		Psychological and General well-being	Yes		4	3	3	2	3	4	4	2	3	2	2	2	2
F	38	18-39	High School	Employed	No	No	Tecnological problems		Yes		3	3	3	2	2	3	4	2	3	4	3	3	2
M	38	18-39	Degree	Employed	Yes	Yes		Psychological and General well-being	No	Psychological aspects	4	3	3	1	2	3	4	1	2	2	3	2	2
F	30	18-39	Degree	Employed	Yes	Yes		Psychological and General well-being	Yes		3	3	3	2	3	3	3	2	3	2	3	2	2
F	37	18-39	Master's Degree	Employed	No	Yes		Psychological well-being	No	Psychological aspects	4	3	3	2	3	4	4	2	2	2	3	3	1
M	35	18-39	High School	Freelance	Yes	No	Covid19 problems		Yes		4	3	4	1	3	4	4	1	3	1	4	3	2
F	28	18-39	High School	Employed	Yes	Yes		Psychological and Physical well-being	Yes		4	4	3	2	3	4	4	2	3	2	4	2	2
F	33	18-39	Master's Degree	Employed	Yes	Yes		Psychological and General well-being	Yes		4	4	4	3	3	3	4	2	3	2	2	2	1
F	38	18-39	High School	Freelance	Yes	Yes		Psychological and General well-being	Yes		4	2	2	3	2	3	2	1	3	2	1	2	1
F	35	18-39	Master's Degree	Unemployed	Yes	Yes		Psychological and General well-being	Yes		4	3	4	2	3	4	3	1	2	1	2	3	2
F	30	18-39	Master's Degree	Employed	Yes	Yes		General well-being	Yes		4	3	4	2	4	4	4	2	3	1	3	2	1
F	30	18-39	Master's Degree	Employed	No	No	Psycho-social aspects		No	Psychological aspects	3	3	2	2	3	3	3	1	3	2	3	1	1
M	26	18-39	High School	Freelance	Yes	Yes		Psychological and Physical well-being	Yes		4	3	3	3	2	3	4	2	2	1	3	3	1
F	34	18-39	Master's Degree	Employed	No	No	Psycho-social aspects		No	Psychological aspects	4	3	4	2	3	3	4	1	4	1	3	2	2
F	33	18-39	Master's Degree	Employed	No	No	Psycho-social aspects		No	Psychological aspects	3	4	4	2	3	3	3	1	4	1	4	3	1
M	27	18-39	Master's Degree	Employed	Yes	Yes		Psychological and General well-being	Yes		4	2	3	2	2	3	3	2	3	3	3	2	2
F	37	18-39	Master's Degree	Employed	Yes	No	Psycho-social aspects		No	Psychological aspects	3	4	2	1	2	4	4	1	3	3	3	3	2
F	32	18-39	High School	Employed	Yes	Yes		Psychological well-being	Yes		4	3	4	3	4	4	4	2	3	2	3	2	2
M	26	18-39	High School	Student	Yes	No	Environmental problems		Yes		4	4	4	1	4	4	4	1	3	1	3	3	1
F	37	18-39	Degree	Freelance	No	No	Psycho-social aspects		No	Psychological aspects	3	2	2	2	3	4	4	2	3	2	3	2	1
M	37	18-39	Degree	Freelance	Yes	Yes		Psychological and Physical well-being	Yes		3	4	4	2	3	3	3	2	3	1	2	2	2
F	28	18-39	High School	Employed	Yes	Yes		Psychological well-being	Yes		3	2	3	3	2	3	3	2	3	2	3	3	2
F	30	18-39	Master's Degree	Freelance	Yes	Yes		Psychological and Physical well-being	Yes		4	4	4	2	4	4	4	1	4	1	3	4	2
F	35	18-39	High School	Freelance	No	Yes		Psychological and Physical well-being	Yes		4	2	3	2	2	3	4	1	3	2	2	2	2
M	36	18-39	Master's Degree	Unemployed	No	No	Health problems		No	Health problems	4	3	3	2	2	4	4	1	2	2	3	2	2
F	28	18-39	High School	Employed	Yes	Yes		Psychological and Physical well-being	No	Covid19 problems	4	4	4	3	3	4	4	1	4	1	3	3	1
F	31	18-39	Master's Degree	Freelance	Yes	Yes		Psychological well-being	Yes		4	4	4	2	4	4	4	1	4	1	3	2	1
M	39	18-39	High School	Freelance	Yes	Yes		Psychological and General well-being	Yes		3	3	3	2	2	3	2	1	2	3	3	2	3
M	27	18-39	High School	Employed	No	No	Psycho-social aspects		No	Psychological aspects	4	2	3	2	2	2	3	3	1	4	1	2	2
M	27	18-39	High School	Employed	Yes	Yes		Psychological and Physical well-being	Yes		4	3	3	3	2	4	4	2	3	2	2	2	2
M	29	18-39	Master's Degree	Employed	Yes	Yes		General well-being	Yes		3	3	3	1	3	3	3	1	2	1	3	2	2
F	36	18-39	High School	Employed	Yes	Yes		Psychological and General well-being	Yes		4	4	4	2	4	4	4	2	2	1	4	2	2
F	38	18-39	Degree	Employed	No	No	Psycho-social aspects		No	Psychological aspects	4	3	2	2	3	4	4	1	2	2	3	1	1
F	32	18-39	Degree	Employed	No	Yes		Psychological and Physical well-being	No	Environmental problems	4	3	3	2	3	4	4	1	3	1	3	4	2
M	30	18-39	Master's Degree	Employed	Yes	Yes		Psychological well-being	No	Psychological aspects	4	3	3	2	3	4	3	2	4	1	1	3	2
F	29	18-39	High School	Employed	Yes	Yes		Psychological and Physical well-being	Yes		4	4	3	3	3	4	4	1	3	1	2	3	2
F	30	18-39	High School	Employed	Yes	Yes		Physical and General well-being	Yes		4	4	4	2	4	4	4	2	4	2	3	3	2
F	27	18-39	Master's Degree	Employed	No	No	Psycho-social aspects		No	Environmental problems	4	3	3	2	3	4	4	3	4	2	2	2	3
M	26	18-39	High School	Freelance	Yes	Yes		Psychological and Physical well-being	Yes		4	3	3	3	3	4	4	1	3	2	2	2	1
F	37	18-39	Master's Degree	Unemployed	No	No	Psycho-social aspects		No	Psychological aspects	4	4	4	1	3	4	4	1	3	1	3	3	2
M	37	18-39	Master's Degree	Employed	No	No	Psycho-social aspects		No	Psychological aspects	3	3	3	2	3	3	4	2	3	2	2	3	1
M	35	18-39	Master's Degree	Employed	Yes	Yes		Physical and General well-being	Yes		4	3	2	3	3	3	3	2	3	2	2	2	2
M	30	18-39	High School	Employed	Yes	Yes		Psychological and Physical well-being	Yes		4	3	2	2	3	4	4	2	2	1	2	2	1
F	30	18-39	Master's Degree	Freelance	Yes	Yes		Psychological well-being	Yes		4	3	2	2	3	4	4	2	2	1	2	2	2
F	26	18-39	Degree	Employed	No	No	Environmental problems		No	Socio-Economics problems	3	2	2	1	2	3	4	1	2	2	4	1	2
M	26	18-39	Degree	Employed	Yes	Yes		Psychological well-being	Yes		4	2	3	3	3	2	3	3	3	1	1	1	4
M	27	18-39	High School	Employed	Yes	Yes		General well-being	Yes		3	2	2	3	2	3	3	2	2	4	1	3	3
F	27	18-39	High School	Employed	Yes	Yes		Psychological and Physical well-being	Yes		4	2	3	2	2	2	3	2	2	3	3	3	2
M	29	18-39	Master's Degree	Employed	Yes	Yes		Psychological well-being	Yes		4	2	3	2	1	3	3	3	3	3	4	3	3
F	31	18-39	High School	Employed	Yes	Yes		Psychological and Physical well-being	Yes		4	3	2	2	3	3	4	2	3	2	3	3	2
M	29	18-39	High School	Employed	Yes	Yes		General well-being	Yes		4	2	3	3	2	3	3	2	2	3	3	3	2
F	27	18-39	High School	Freelance	No	No	Environmental problems		No	Socio-Economics problems	4	3	4	2	3	4	4	1	1	2	4	2	2
F	32	18-39	Master's Degree	Freelance	Yes	Yes		Physical well-being	Yes		4	4	3	3	2	2	3	2	2	3	2	3	2
F	38	18-39	High School	Employed	Yes	Yes		Psychological and General well-being	Yes		4	3	3	2	3	4	4	2	3	3	3	3	2
M	36	18-39	High School	Employed	Yes	Yes		Psychological and General well-being	Yes		4	3	3	2	3	4	4	2	3	2	3	2	2
F	27	18-39	Master's Degree	Employed	Yes	Yes		Physical and General well-being	Yes		4	3	4	1	3	3	4	2	3	2	2	1	2
M	34	18-39	High School	Employed	Yes	Yes		Psychological and Physical well-being	Yes		4	4	4	2	4	4	4	1	4	1	3	4	3
M	28	18-39	High School	Employed	Yes	Yes		Psychological and General well-being	Yes		4	4	4	2	4	4	4	2	4	1	2	3	1
M	35	18-39	Master's Degree	Other	Yes	No	Covid19 problems		Yes		3	4	4	1	4	4	4	1	4	1	4	1	1
M	26	18-39	Degree	Employed	Yes	Yes		General well-being	Yes		4	3	2	1	2	1	1	1	1	1	4	1	1
M	35	18-39	High School	Employed	Yes	No	Psycho-social aspects		No	Psychological aspects	4	3	3	1	3	4	4	1	3	1	2	1	1
F	28	18-39	High School	Freelance	Yes	Yes		Psychological and General well-being	Yes		4	4	4	2	4	4	4	2	4	1	3	3	1
F	26	18-39	Master's Degree	Freelance	Yes	Yes		Psychological and General well-being	Yes		4	1	4	4	4	3	4	2	4	2	4	4	2
F	39	18-39	High School	Employed	Yes	No	Health problems		No	Covid19 problems	4	4	4	4	4	4	4	2	4	2	4	2	2
F	27	18-39	Master's Degree	Employed	Yes	Yes		Psychological well-being	Yes		4	4	3	3	3	4	4	1	4	1	4	3	3
M	29	18-39	High School	Employed	No	No	Psycho-social aspects		No	Covid19 problems	3	3	4	2	2	3	3	2	3	2	2	2	2
M	27	18-39	Master's Degree	Employed	No	Yes		Physical well-being	No	Psychological aspects	3	3	3	3	3	3	3	2	3	2	2	2	2
M	26	18-39	High School	Student	No	Yes		Psychological and General well-being	No	Psychological aspects	3	3	3	3	2	4	4	2	3	2	2	2	1
M	35	18-39	Degree	Freelance	Yes	No	Tecnological problems		No	Psychological aspects	4	2	3	2	3	2	2	2	2	3	3	3	2
M	36	18-39	High School	Employed	No	No	Environmental problems		No	Socio-Economics problems	3	3	4	1	3	3	4	2	4	1	4	1	1
M	28	18-39	Master's Degree	Freelance	Yes	Yes		Psychological well-being	Yes		3	3	3	2	3	3	3	2	3	2	3	2	1
M	28	18-39	High School	Employed	No	Yes		Psychological well-being	Yes		3	4	4	2	4	3	3	1	3	1	4	1	2
F	28	18-39	High School	Employed	No	No	Psycho-social aspects		No	Psychological aspects	4	3	3	3	2	3	3	3	3	3	3	3	3
M	37	18-39	High School	Freelance	Yes	No	Psycho-social aspects		Yes		4	2	2	2	2	3	3	2	3	1	3	2	1
F	42	40-49	High School	Employed	Yes	Yes		Physical and General well-being	Yes		4	3	4	2	3	3	4	2	2	3	3	3	2
F	46	40-49	Master's Degree	Employed	No	No	Psycho-social aspects		No	Psychological aspects	4	3	3	2	3	3	3	1	1	1	3	2	1
F	42	40-49	High School	Employed	Yes	Yes		Psychological and Physical well-being	Yes		4	3	4	1	3	4	4	1	3	1	3	2	1
M	46	40-49	High School	Employed	Yes	Yes		Psychological and Physical well-being	Yes		4	4	4	2	4	4	4	4	4	4	4	4	4
F	47	40-49	Master's Degree	Employed	Yes	Yes		Psychological and General well-being	Yes		4	3	3	2	4	4	4	1	3	1	3	1	1
F	42	40-49	High School	Freelance	Yes	No	Environmental problems		No	Socio-Economics problems	4	4	4	1	4	4	4	1	4	1	1	1	1
F	48	40-49	High School	Employed	Yes	No	Psycho-social aspects		Yes		4	4	4	1	3	4	4	2	4	1	3	2	1
F	49	40-49	Degree	Employed	Yes	Yes		Psychological and Physical well-being	Yes		4	4	4	2	4	4	4	2	4	2	2	3	2
F	42	40-49	High School	Employed	No	No	Psycho-social aspects		No	Psychological aspects	4	3	4	2	3	4	4	1	4	2	3	3	1
F	48	40-49	High School	Employed	Yes	Yes		Physical and General well-being	Yes		4	3	3	3	2	3	3	3	2	3	3	2	2
F	41	40-49	Master's Degree	Employed	No	No	Health problems		Yes		4	3	3	1	2	3	3	1	3	1	2	2	2
F	47	40-49	High School	Freelance	Yes	Yes		Psychological and General well-being	No	Covid19 problems	4	4	4	1	4	4	4	1	4	1	2	1	1
F	49	40-49	Degree	Employed	Yes	Yes		Psychological and General well-being	Yes		4	4	4	3	4	4	4	2	4	1	4	4	1
F	47	40-49	Degree	Employed	Yes	Yes		Psychological and Physical well-being	Yes		4	2	2	3	2	3	1	3	1	2	2	3	2
M	48	40-49	High School	Employed	Yes	Yes		Physical and General well-being	Yes		4	3	3	1	3	3	2	2	2	2	2	3	2
F	47	40-49	High School	Employed	Yes	Yes		Psychological and Physical well-being	Yes		4	3	3	2	3	4	4	3	4	2	3	2	2
F	43	40-49	Degree	Freelance	Yes	No	Environmental problems		No	Psychological aspects	4	4	4	2	3	4	4	1	3	3	3	3	3
F	46	40-49	Degree	Employed	Yes	Yes		Psychological well-being	Yes		4	4	4	3	3	4	4	1	3	2	4	3	1
F	42	40-49	High School	Employed	Yes	Yes		Psychological well-being	No	Psychological aspects	4	3	3	2	3	3	3	2	3	3	2	2	2
F	42	40-49	High School	Employed	Yes	No	Tecnological problems		Yes		4	4	4	2	3	4	4	1	4	1	3	4	1
F	43	40-49	Master's Degree	Employed	Yes	Yes		Psychological and Physical well-being	No	Psychological aspects	4	4	4	2	3	4	4	2	4	2	3	2	2
F	43	40-49	High School	Employed	Yes	Yes		Psychological and Physical well-being	Yes		4	3	3	3	3	3	4	2	2	2	3	2	1
M	49	40-49	Master's Degree	Freelance	Yes	Yes		Psychological well-being	Yes		4	3	3	3	2	3	3	2	2	2	2	2	1
F	41	40-49	High School	Freelance	No	No	Psycho-social aspects		No	Socio-Economics problems	4	2	2	1	3	3	3	1	3	2	2	2	2
F	47	40-49	Degree	Employed	No	No	Psycho-social aspects		No	Socio-Economics problems	3	3	3	2	3	3	3	2	2	2	1	2	2
F	44	40-49	Degree	Employed	Yes	Yes		Psychological and Physical well-being	Yes		4	3	3	2	3	2	3	3	4	1	2	3	3
F	49	40-49	High School	Unemployed	Yes	Yes		Psychological and General well-being	Yes		4	3	3	2	3	3	3	2	3	2	1	2	2
F	46	40-49	High School	Homemade	Yes	Yes		Psychological well-being	Yes		4	3	3	2	3	4	4	1	3	2	3	4	3
F	48	40-49	Master's Degree	Employed	Yes	No	Psycho-social aspects		No	Psychological aspects	4	4	4	2	3	4	4	4	2	2	3	2	2
F	47	40-49	High School	Employed	Yes	No	Environmental problems		No	Socio-Economics problems	4	3	4	2	3	4	4	2	3	2	4	2	2
F	48	40-49	High School	Homemade	Yes	Yes		Psychological and General well-being	Yes		4	3	3	2	3	3	4	1	4	1	2	2	1
F	43	40-49	High School	Employed	No	Yes		Psychological and General well-being	No	Socio-Economics problems	4	3	4	2	3	4	4	1	3	1	2	2	1
F	48	40-49	Master's Degree	Employed	No	No	Psycho-social aspects		No	Psychological aspects	4	2	2	2	3	3	4	1	2	1	2	1	1
F	43	40-49	High School	Retired	Yes	Yes		Psychological and General well-being	No	Socio-Economics problems	4	4	4	2	4	4	4	1	4	2	3	2	3
F	46	40-49	High School	Employed	Yes	No	Covid19 problems		No	Covid19 problems	4	2	2	2	2	3	3	2	2	3	3	3	2
F	43	40-49	PhD	Employed	Yes	Yes		Physical and General well-being	Yes		4	4	4	2	4	4	4	2	4	1	3	1	1
F	48	40-49	High School	Employed	Yes	No	Environmental problems		No	Psychological aspects	4	4	4	1	3	4	4	1	4	1	4	3	2
F	43	40-49	Master's Degree	Employed	No	Yes		Physical and General well-being	Yes		4	4	3	3	3	3	3	2	3	2	2	2	1
F	43	40-49	High School	Freelance	Yes	Yes		Physical well-being	Yes		4	3	3	2	3	3	3	2	3	1	3	3	2
F	44	40-49	Degree	Homemade	Yes	Yes		Psychological and General well-being	Yes		4	4	4	2	4	4	4	2	3	1	3	2	1
F	42	40-49	Degree	Employed	Yes	Yes		Psychological and Physical well-being	Yes		4	3	3	3	3	3	4	2	3	2	3	3	1
F	47	40-49	High School	Employed	No	No	Psycho-social aspects		No	Psychological aspects	3	3	3	2	2	3	4	1	3	3	2	2	1
F	43	40-49	High School	Homemade	No	No	Psycho-social aspects		No	Psychological aspects	4	3	3	1	3	4	4	1	3	2	3	3	2
F	44	40-49	Master's Degree	Employed	Yes	Yes		Physical well-being	Yes		3	3	2	3	1	4	4	1	1	1	4	2	1
F	47	40-49	High School	Employed	No	Yes		Psychological well-being	Yes		4	4	4	3	4	4	4	2	4	1	4	1	2
F	43	40-49	High School	Employed	No	No	Psycho-social aspects		No	Socio-Economics problems	4	3	3	1	2	4	4	1	3	1	4	1	1
F	48	40-49	Master's Degree	Unemployed	Yes	No	Psycho-social aspects		Yes		4	3	2	2	2	3	3	2	3	2	3	2	2
F	40	40-49	High School	Freelance	No	Yes		Psychological well-being	No	Psychological aspects	4	4	3	2	3	4	4	2	3	1	2	2	2
F	47	40-49	High School	Employed	No	No	Health problems		No	Health problems	4	3	3	2	2	3	3	2	4	2	2	2	2
F	46	40-49	High School	Employed	Yes	Yes		General well-being	Yes		4	3	3	3	2	3	4	1	3	2	2	3	1
F	47	40-49	Master's Degree	Employed	No	No	Psycho-social aspects		No	Psychological aspects	4	3	4	1	3	4	4	1	4	2	3	2	1
F	48	40-49	High School	Homemade	Yes	No	Psycho-social aspects		No	Psychological aspects	4	4	3	1	4	4	4	1	4	1	4	1	1
F	42	40-49	Degree	Employed	Yes	No	Psycho-social aspects		No	Socio-Economics problems	4	3	4	2	3	4	4	2	4	2	3	2	2
F	41	40-49	Degree	Employed	Yes	No	Covid19 problems		Yes		4	4	4	2	4	4	4	1	4	1	3	1	2
M	44	40-49	Master's Degree	Freelance	Yes	No	Environmental problems		Yes		4	4	3	2	3	4	4	2	2	3	4	2	2
F	42	40-49	High School	Freelance	No	No	Psycho-social aspects		No	Psychological aspects	4	4	4	1	4	4	4	1	4	1	3	1	1
F	49	40-49	High School	Employed	Yes	Yes		Psychological and General well-being	Yes		4	2	3	3	2	3	4	2	4	3	2	4	2
F	49	40-49	High School	Employed	Yes	No	Psycho-social aspects		Yes		3	4	2	1	4	4	4	1	4	4	2	4	4
F	45	40-49	Master's Degree	Unemployed	Yes	Yes		Psychological and General well-being	Yes		4	3	3	3	4	4	4	2	3	2	3	2	2
F	44	40-49	High School	Employed	No	No	Psycho-social aspects		No	Psychological aspects	4	3	3	2	2	4	4	1	4	2	3	2	2
F	40	40-49	High School	Employed	No	No	Psycho-social aspects		No	Psychological aspects	3	3	2	2	2	3	3	2	2	3	2	3	1
F	47	40-49	High School	Employed	Yes	Yes		Psychological and General well-being	Yes		4	3	4	3	3	3	3	1	3	2	3	2	2
F	48	40-49	Master's Degree	Employed	Yes	Yes		Physical and General well-being	Yes		4	3	3	3	2	4	3	2	3	2	3	2	2
F	43	40-49	High School	Employed	Yes	Yes		Psychological and Physical well-being	Yes		4	4	4	3	4	4	4	2	4	1	3	1	1
F	44	40-49	Master's Degree	Employed	Yes	Yes		Psychological and General well-being	Yes		4	3	3	3	3	3	3	2	3	2	3	2	2
F	48	40-49	High School	Homemade	Yes	Yes		Psychological and Physical well-being	No	Health problems	3	2	3	2	2	3	4	1	4	1	4	2	1
F	48	40-49	High School	Homemade	No	Yes		Psychological and General well-being	No	Psychological aspects	4	3	4	2	3	4	4	1	3	1	3	1	1
F	43	40-49	Master's Degree	Employed	Yes	Yes		General well-being	Yes		3	3	2	3	2	3	4	1	3	2	3	2	2
F	44	40-49	Degree	Employed	Yes	Yes		Physical and General well-being	Yes		4	4	4	2	4	4	4	1	2	3	2	4	2
F	47	40-49	High School	Employed	Yes	No	Psycho-social aspects		Yes		4	4	4	2	3	4	4	2	2	2	3	2	2
F	45	40-49	High School	Freelance	No	Yes		Psychological well-being	No	Psychological aspects	3	3	2	3	3	3	3	3	2	2	2	3	1
F	49	40-49	Master's Degree	Employed	No	No	Environmental problems		No	Socio-Economics problems	3	3	3	1	4	3	3	1	2	2	4	3	1
M	46	40-49	High School	Employed	Yes	Yes		General well-being	No	Psychological aspects	3	2	3	1	2	4	3	2	3	1	3	3	1
F	48	40-49	High School	Employed	Yes	No	Psycho-social aspects		Yes		4	4	4	2	4	4	4	1	4	2	3	1	1
F	45	40-49	Degree	Employed	No	Yes		Psychological and General well-being	No	Psychological aspects	4	4	4	2	3	4	4	2	3	2	3	3	2
F	49	40-49	Master's Degree	Employed	Yes	Yes		Psychological and Physical well-being	Yes		3	2	3	2	2	3	4	1	2	1	2	2	1
F	46	40-49	High School	Employed	No	No	Health problems		No	Health problems	3	4	3	2	3	4	3	2	2	2	3	2	2
F	44	40-49	High School	Employed	Yes	Yes		Physical and General well-being	Yes		4	4	3	2	3	4	3	2	3	2	2	3	2
M	40	40-49	Master's Degree	Freelance	Yes	Yes		General well-being	Yes		3	2	3	3	2	2	2	2	2	2	2	3	3
F	43	40-49	High School	Freelance	Yes	Yes		Psychological and General well-being	Yes		4	3	3	3	3	4	4	2	3	2	4	3	1
F	45	40-49	Master's Degree	Employed	No	Yes		Psychological well-being	No	Psychological aspects	4	3	3	2	3	4	4	2	3	2	4	3	2
F	46	40-49	High School	Employed	No	Yes		Physical well-being	No	Psychological aspects	4	4	3	2	3	4	4	1	3	2	3	2	2
F	49	40-49	Master's Degree	Employed	Yes	Yes		Psychological well-being	No	Psychological aspects	4	3	3	2	3	4	4	2	3	2	2	2	2
F	47	40-49	High School	Homemade	Yes	Yes		Psychological and General well-being	Yes		4	3	3	2	3	3	4	2	3	2	3	2	2
F	43	40-49	High School	Employed	Yes	Yes		Psychological well-being	Yes		4	4	3	4	4	3	4	2	3	2	3	3	1
F	45	40-49	Master's Degree	Employed	Yes	Yes		Physical and General well-being	Yes		4	3	3	3	3	3	3	1	3	1	2	2	2
F	45	40-49	Degree	Employed	Yes	Yes		Psychological and General well-being	No	Psychological aspects	4	2	4	2	2	3	2	3	3	2	3	3	2
F	49	40-49	Degree	Employed	Yes	Yes		General well-being	Yes		4	4	4	3	4	4	4	2	4	2	4	3	1
F	45	40-49	High School	Employed	Yes	Yes		Physical and General well-being	Yes		4	4	4	3	4	4	4	1	4	1	3	1	1
M	46	40-49	Master's Degree	Employed	Yes	Yes		Psychological well-being	Yes		4	2	3	2	2	3	3	2	2	1	4	1	1
F	47	40-49	High School	Employed	Yes	Yes		Psychological well-being	No	Covid19 problems	4	4	4	1	3	4	4	1	4	4	2	3	2
F	41	40-49	High School	Employed	Yes	No	Psycho-social aspects		No	Psychological aspects	4	2	3	3	2	3	4	2	3	2	2	2	1
F	45	40-49	High School	Freelance	No	No	Environmental problems		No	Environmental problems	4	4	4	1	3	4	4	1	4	1	1	1	1
M	44	40-49	Master's Degree	Employed	Yes	Yes		Psychological and General well-being	Yes		4	3	3	3	3	3	3	3	3	2	3	2	2
F	44	40-49	High School	Homemade	No	Yes		Psychological well-being	No	Psychological aspects	4	3	3	2	3	4	4	2	2	2	2	3	2
F	43	40-49	Master's Degree	Employed	No	No	Psycho-social aspects		No	Psychological aspects	4	2	3	1	3	3	4	2	2	3	2	2	3
F	44	40-49	High School	Employed	Yes	No	Environmental problems		Yes		4	4	3	1	3	4	4	1	3	1	2	1	2
F	43	40-49	High School	Employed	Yes	No	Psycho-social aspects		Yes		4	3	4	2	4	4	4	1	4	3	3	3	2
M	49	40-49	Degree	Employed	Yes	Yes		Psychological well-being	Yes		4	3	3	2	2	3	3	2	2	3	2	3	1
F	46	40-49	Degree	Employed	Yes	Yes		Psychological well-being	Yes		4	4	4	3	4	4	4	1	1	1	4	2	1
F	46	40-49	High School	Employed	No	Yes		Psychological well-being	No	Psychological aspects	3	2	3	2	2	3	3	3	2	2	2	3	2
F	42	40-49	Degree	Unemployed	Yes	Yes		Psychological and Physical well-being	Yes		4	4	4	4	4	4	4	1	4	1	1	1	1
F	46	40-49	Degree	Employed	Yes	Yes		Psychological and General well-being	Yes		4	3	3	3	4	4	4	1	4	2	2	2	1
F	48	40-49	High School	Employed	Yes	Yes		Psychological and General well-being	Yes		4	3	3	3	3	3	3	3	3	3	1	4	1
F	48	40-49	Degree	Employed	Yes	Yes		Physical and General well-being	Yes		4	3	3	3	2	4	3	2	3	2	3	2	2
M	43	40-49	PhD	Employed	Yes	Yes		Psychological well-being	Yes		4	4	3	1	3	3	4	1	1	1	2	3	1
F	48	40-49	Master's Degree	Employed	No	Yes		Psychological well-being	No	Environmental problems	3	2	4	1	4	4	3	1	3	1	4	3	1
F	40	40-49	Degree	Employed	Yes	Yes		Psychological and General well-being	Yes		4	3	3	2	2	3	4	1	3	1	1	3	1
F	47	40-49	Secondary school	Employed	Yes	Yes		Psychological well-being	Yes		4	4	4	2	4	4	4	1	4	1	3	3	3
F	49	40-49	Degree	Employed	No	No	Psycho-social aspects		No	Psychological aspects	3	1	2	2	3	3	3	2	2	2	2	2	2
F	40	40-49	High School	Employed	Yes	Yes		Psychological and Physical well-being	Yes		4	3	4	2	3	3	4	1	3	2	2	2	1
F	48	40-49	High School	Freelance	Yes	Yes		Psychological and General well-being	Yes		4	4	4	3	4	4	4	1	3	1	3	1	1
F	44	40-49	High School	Freelance	Yes	Yes		Physical and General well-being	Yes		4	4	4	2	4	4	4	1	3	4	4	2	1
M	45	40-49	High School	Employed	Yes	Yes		General well-being	No	Health problems	4	3	3	2	2	3	3	1	3	2	4	2	1
F	43	40-49	High School	Employed	Yes	Yes		Physical and General well-being	Yes		4	4	4	4	4	4	4	4	4	4	4	4	4
M	45	40-49	High School	Employed	Yes	Yes		Psychological and General well-being	Yes		3	3	4	2	3	3	3	1	3	3	3	2	1
F	47	40-49	High School	Employed	Yes	No	Psycho-social aspects		Yes		4	3	3	2	2	3	4	1	3	1	3	2	2
F	48	40-49	High School	Homemade	No	No	Covid19 problems		No	Psychological aspects	4	4	3	1	4	4	4	3	2	1	4	2	4
F	40	40-49	High School	Employed	No	No	Psycho-social aspects		No	Psychological aspects	4	3	3	2	1	4	4	1	3	2	4	1	1
F	44	40-49	High School	Homemade	No	Yes		Psychological and Physical well-being	No	Socio-Economics problems	3	3	3	2	1	3	3	2	3	2	3	3	3
F	45	40-49	Secondary school	Employed	No	No	Psycho-social aspects		No	Environmental problems	3	3	3	2	3	4	4	1	4	1	4	2	1
F	45	40-49	Secondary school	Unemployed	Yes	Yes		General well-being	No	Psychological aspects	4	3	4	2	1	4	4	1	4	1	1	1	1
M	45	40-49	Degree	Employed	Yes	No	Psycho-social aspects		No	Psychological aspects	4	3	4	2	4	4	4	2	3	2	3	3	2
M	49	40-49	Degree	Freelance	Yes	Yes		Psychological and General well-being	Yes		4	4	4	1	4	4	4	1	4	3	3	2	2
F	49	40-49	Secondary school	Freelance	No	Yes		Psychological and General well-being	Yes		3	4	3	2	3	3	3	3	4	1	2	2	1
F	48	40-49	High School	Employed	No	No	Psycho-social aspects		No	Psychological aspects	4	3	3	1	3	3	4	1	3	2	3	2	2
F	46	40-49	High School	Employed	Yes	Yes		Psychological and General well-being	Yes		4	3	3	3	3	3	4	2	3	3	3	2	2
M	45	40-49	High School	Employed	No	Yes		Psychological and General well-being	No	Socio-Economics problems	3	3	3	2	3	4	4	1	3	2	3	2	1
F	44	40-49	High School	Employed	Yes	Yes		Psychological well-being	No	Covid19 problems	4	4	4	1	3	4	3	2	4	3	2	3	1
F	49	40-49	High School	Employed	Yes	Yes		Physical and General well-being	Yes		4	4	3	3	3	3	3	1	2	3	3	2	1
F	44	40-49	High School	Employed	No	No	Psycho-social aspects		No	Psychological aspects	4	2	4	3	4	3	3	2	3	2	2	3	2
F	44	40-49	High School	Employed	No	No	Psycho-social aspects		No	Psychological aspects	4	1	1	1	3	3	3	2	3	3	3	2	2
F	43	40-49	High School	Homemade	Yes	Yes		General well-being	No	Psychological aspects	4	3	4	2	4	4	3	3	3	2	3	2	2
F	47	40-49	High School	Employed	Yes	Yes		Psychological well-being	Yes		4	4	4	1	3	4	4	1	4	1	1	1	1
F	42	40-49	High School	Employed	No	Yes		Psychological and General well-being	Yes		4	4	4	2	3	4	4	1	2	1	2	1	2
M	46	40-49	High School	Employed	Yes	Yes		Psychological and Physical well-being	Yes		4	4	4	2	4	4	4	4	4	4	4	4	4
F	41	40-49	High School	Unemployed	Yes	Yes		Psychological well-being	No	Psychological aspects	4	4	3	2	3	4	4	2	3	1	2	2	2
F	48	40-49	High School	Employed	Yes	No	Psycho-social aspects		No	Psychological aspects	4	4	4	2	4	4	4	1	4	1	4	2	1
F	44	40-49	High School	Employed	Yes	No	Psycho-social aspects		No	Psychological aspects	4	3	3	2	2	3	3	2	2	2	2	3	3
F	41	40-49	Degree	Employed	Yes	Yes		Psychological and General well-being	Yes		4	4	4	2	3	4	4	2	3	2	3	3	2
M	40	40-49	Degree	Employed	Yes	Yes		Psychological well-being	Yes		4	4	3	3	3	4	4	2	4	2	3	2	3
M	49	40-49	High School	Employed	Yes	Yes		Psychological and General well-being	Yes		4	4	4	3	3	4	4	2	2	2	2	2	2
F	43	40-49	Master's Degree	Employed	Yes	Yes		General well-being	Yes		4	4	4	1	4	4	4	1	4	2	3	2	1
F	42	40-49	High School	Employed	Yes	Yes		Psychological well-being	Yes		4	3	4	1	3	4	4	1	4	1	2	3	3
M	49	40-49	High School	Employed	No	Yes		Psychological and General well-being	Yes		4	4	3	2	3	3	3	1	4	2	4	2	1
F	44	40-49	High School	Employed	Yes	No	Psycho-social aspects		No	Covid19 problems	4	3	4	1	4	4	4	3	3	4	2	4	4
F	45	40-49	High School	Employed	Yes	No	Psycho-social aspects		No	Health problems	3	3	4	1	3	3	4	1	3	3	4	1	3
F	40	40-49	Secondary school	Employed	Yes	Yes		Psychological well-being	Yes		4	3	3	2	3	3	4	1	1	2	3	2	2
F	43	40-49	Degree	Freelance	No	No	Psycho-social aspects		No	Health problems	4	3	3	2	2	3	3	1	3	2	2	2	1
M	44	40-49	Degree	Employed	No	No	Psycho-social aspects		No	Health problems	4	4	3	3	1	4	4	1	3	2	4	2	2
F	46	40-49	Secondary school	Homemade	Yes	Yes		Physical and General well-being	Yes		4	3	3	3	3	3	3	3	3	2	4	3	1
M	48	40-49	Secondary school	Unemployed	No	No	Psycho-social aspects		No	Psychological aspects	4	4	3	1	3	4	3	3	4	2	3	2	2
F	42	40-49	Master's Degree	Employed	No	No	Health problems		No	Health problems	4	2	3	1	3	3	4	1	1	1	3	1	1
F	49	40-49	High School	Employed	No	No	Health problems		No	Health problems	4	3	3	2	3	3	4	1	3	2	2	1	2
M	44	40-49	High School	Employed	Yes	Yes		Physical and General well-being	Yes		4	3	3	2	3	3	3	3	3	3	2	4	4
M	44	40-49	High School	Employed	No	Yes		Psychological and Physical well-being	No	Psychological aspects	3	3	3	3	3	3	4	2	3	2	3	3	2
F	45	40-49	High School	Employed	No	Yes		Psychological well-being	No	Psychological aspects	3	3	3	2	3	3	3	2	3	2	3	3	2
F	56	50-64	High School	Employed	Yes	Yes		Psychological and Physical well-being	Yes		4	3	3	2	3	3	3	2	4	3	3	3	3
F	63	50-64	High School	Retired	Yes	Yes		Psychological and General well-being	Yes		3	3	3	2	3	3	3	2	3	3	2	2	2
F	52	50-64	High School	Employed	No	No	Psycho-social aspects		No	Psychological aspects	4	3	3	2	2	3	3	3	2	2	2	2	2
M	51	50-64	High School	Employed	Yes	Yes		Psychological well-being	Yes		4	3	4	3	3	3	4	2	2	2	2	2	1
M	62	50-64	High School	Unemployed	Yes	Yes		Psychological and General well-being	Yes		4	3	4	3	3	3	3	2	3	2	4	2	2
F	64	50-64	High School	Retired	Yes	No	Psycho-social aspects		Yes		4	4	4	2	3	3	4	2	3	2	2	2	2
F	53	50-64	High School	Employed	Yes	Yes		General well-being	Yes		4	2	3	2	2	4	4	2	3	2	3	4	3
M	53	50-64	High School	Employed	Yes	Yes		Physical and General well-being	Yes		4	3	3	3	3	3	3	2	3	3	2	3	2
F	53	50-64	High School	Employed	Yes	No	Psycho-social aspects		Yes		4	3	4	2	4	4	4	2	4	2	3	3	2
F	51	50-64	High School	Employed	Yes	No	Environmental problems		No	Covid19 problems	4	3	2	1	3	3	4	1	2	3	2	3	2
F	56	50-64	High School	Employed	Yes	Yes		Psychological and General well-being	Yes		4	4	4	3	4	4	3	2	4	1	2	2	1
F	50	50-64	Degree	Employed	Yes	No	Environmental problems		No	Covid19 problems	3	3	3	2	2	4	4	2	4	3	3	3	3
F	60	50-64	Secondary school	Homemade	Yes	Yes		Psychological and General well-being	Yes		4	4	4	2	3	4	4	2	4	2	2	3	2
F	57	50-64	PhD	Employed	Yes	Yes		Psychological well-being	Yes		4	4	4	2	3	3	3	1	3	1	3	1	1
F	52	50-64	High School	Employed	Yes	Yes		Psychological and Physical well-being	Yes		4	4	4	3	4	4	4	1	4	1	3	1	1
F	59	50-64	High School	Unemployed	Yes	Yes		Psychological and General well-being	Yes		4	3	3	3	3	3	4	2	3	2	1	2	1
F	51	50-64	High School	Employed	Yes	Yes		General well-being	Yes		4	3	3	3	2	4	4	1	1	1	1	1	1
M	53	50-64	High School	Employed	Yes	Yes		Physical and General well-being	Yes		4	3	3	2	3	3	3	2	2	3	2	1	1
F	56	50-64	High School	Employed	Yes	No	Covid19 problems		Yes		4	3	3	2	3	4	4	2	3	2	2	4	3
F	56	50-64	High School	Employed	No	Yes		Psychological and Physical well-being	No	Psychological aspects	4	3	4	2	3	3	3	1	3	2	3	2	1
M	64	50-64	High School	Retired	No	No	Psycho-social aspects		No	Psychological aspects	4	3	3	1	3	3	3	2	3	3	2	2	3
F	51	50-64	High School	Employed	Yes	No	Covid19 problems		No	Covid19 problems	4	3	3	1	2	3	3	1	3	1	1	1	1
F	54	50-64	High School	Employed	No	No	Psycho-social aspects		No	Psychological aspects	3	4	3	3	2	3	4	2	3	1	2	2	1
F	61	50-64	High School	Employed	Yes	Yes		Psychological and General well-being	Yes		4	4	3	2	3	3	4	2	3	2	4	2	2
F	56	50-64	High School	Unemployed	No	No	Covid19 problems		No	Socio-Economics problems	4	3	3	2	3	3	4	1	3	2	3	2	1
M	50	50-64	High School	Employed	Yes	Yes		Psychological and General well-being	Yes		4	3	3	3	3	3	3	2	3	3	2	2	2
F	55	50-64	High School	Employed	Yes	Yes		Psychological well-being	No	Socio-Economics problems	4	3	3	3	3	3	3	4	3	2	2	3	2
F	50	50-64	High School	Employed	No	Yes		Physical and General well-being	Yes		4	4	3	3	2	3	4	2	3	2	2	2	2
F	51	50-64	High School	Unemployed	No	No	Psycho-social aspects		No	Psychological aspects	3	2	1	2	2	3	3	3	2	2	2	2	1
F	50	50-64	High School	Employed	Yes	No	Covid19 problems		Yes		4	3	3	2	2	4	4	2	4	2	4	2	2
F	59	50-64	Degree	Employed	Yes	Yes		Psychological and General well-being	Yes		4	4	4	2	4	3	4	1	4	1	4	2	1
F	56	50-64	PhD	Employed	No	No	Psycho-social aspects		No	Socio-Economics problems	4	2	3	2	2	4	4	2	2	2	3	3	2
F	56	50-64	Degree	Freelance	Yes	Yes		Psychological and Physical well-being	Yes		4	4	4	3	4	4	3	2	3	2	2	3	2
F	55	50-64	Degree	Freelance	Yes	Yes		General well-being	Yes		4	3	3	2	3	3	3	1	3	2	3	3	2
F	50	50-64	Degree	Employed	No	No	Psycho-social aspects		No	Psychological aspects	4	3	3	1	4	4	4	1	3	1	2	2	2
F	51	50-64	PhD	Employed	No	No	Environmental problems		No	Psychological aspects	4	2	4	1	3	3	3	2	4	3	3	2	2
F	56	50-64	Secondary school	Unemployed	Yes	Yes		Psychological well-being	Yes		4	3	3	3	3	3	2	2	3	3	3	2	3
F	52	50-64	High School	Employed	No	Yes		Psychological well-being	No	Health problems	3	3	3	2	3	3	4	2	2	2	3	2	2
F	55	50-64	High School	Employed	Yes	Yes		Psychological well-being	Yes		4	3	3	2	4	4	3	2	2	2	1	3	3
F	52	50-64	High School	Employed	Yes	Yes		Physical and General well-being	Yes		4	4	4	2	3	4	4	2	3	2	4	2	2
F	60	50-64	High School	Employed	Yes	Yes		Psychological and General well-being	Yes		4	3	3	2	3	3	4	2	3	2	3	3	1
F	54	50-64	Degree	Employed	No	No	Tecnological problems		No	Socio-Economics problems	4	3	2	1	3	3	4	1	2	2	1	3	2
F	55	50-64	PhD	Freelance	Yes	No	Health problems		Yes		4	4	4	1	4	4	4	1	4	1	4	2	2
F	63	50-64	Secondary school	Freelance	Yes	No	Psycho-social aspects		No	Psychological aspects	4	3	4	2	3	3	3	2	2	2	3	2	1
M	53	50-64	Degree	Employed	Yes	Yes		Psychological well-being	Yes		4	3	3	3	4	4	3	2	3	2	3	2	1
F	59	50-64	Degree	Freelance	Yes	No	Psycho-social aspects		Yes		4	4	4	2	3	3	4	2	3	1	3	1	2
M	64	50-64	Degree	Freelance	Yes	Yes		Physical and General well-being	Yes		4	3	4	2	3	4	4	2	4	1	2	1	2
F	63	50-64	PhD	Retired	No	No	Psycho-social aspects		No	Psychological aspects	3	3	3	2	3	3	3	2	3	2	3	2	2
F	50	50-64	Secondary school	Employed	No	Yes		Psychological well-being	No	Psychological aspects	4	3	3	2	2	3	4	1	2	4	2	4	2
F	63	50-64	Master's Degree	Retired	Yes	Yes		Physical and General well-being	Yes		4	3	3	3	3	3	2	2	3	1	3	3	2
F	60	50-64	High School	Employed	Yes	No	Tecnological problems		No	Environmental problems	3	3	4	2	3	4	4	2	3	2	4	3	2
F	52	50-64	High School	Employed	Yes	Yes		Psychological well-being	Yes		4	4	4	2	4	4	4	2	2	2	4	2	2
M	56	50-64	High School	Employed	No	Yes		General well-being	No	Health problems	4	3	2	3	3	4	4	2	2	2	3	2	2
F	61	50-64	High School	Unemployed	Yes	Yes		Physical and General well-being	Yes		4	4	4	2	4	4	4	1	4	1	3	3	1
F	54	50-64	Degree	Freelance	No	No	Psycho-social aspects		No	Psychological aspects	4	3	3	2	3	3	3	2	3	2	2	2	2
F	60	50-64	Secondary school	Freelance	Yes	No	Psycho-social aspects		No	Psychological aspects	3	2	2	2	3	2	3	1	3	1	4	3	2
F	60	50-64	Degree	Employed	Yes	Yes		Physical and General well-being	Yes		3	3	2	2	3	3	3	2	2	2	3	2	2
F	55	50-64	Degree	Employed	Yes	Yes		Physical and General well-being	Yes		4	3	3	2	3	4	3	2	2	2	3	2	2
F	52	50-64	Degree	Freelance	Yes	Yes		General well-being	Yes		4	3	3	3	4	4	4	1	3	2	2	2	2
F	57	50-64	Degree	Other	Yes	Yes		General well-being	Yes		4	3	4	2	3	4	4	1	3	2	3	2	2
M	59	50-64	Secondary school	Employed	Yes	No	Covid19 problems		Yes		4	3	4	2	3	4	3	2	3	2	4	3	2
F	53	50-64	Degree	Freelance	Yes	Yes		Psychological and General well-being	Yes		4	4	4	2	4	4	4	1	4	1	3	2	1
F	58	50-64	Degree	Freelance	Yes	No	Tecnological problems		No	Environmental problems	4	4	3	2	3	4	4	2	3	1	3	3	2
F	53	50-64	PhD	Employed	No	Yes		Psychological well-being	No	Psychological aspects	4	3	3	2	2	2	4	3	3	4	2	3	1
F	60	50-64	Master's Degree	Employed	Yes	Yes		Psychological and Physical well-being	Yes		4	4	4	3	4	4	4	2	4	1	3	3	2
F	54	50-64	Degree	Employed	Yes	Yes		Psychological well-being	Yes		4	3	3	2	3	4	4	1	3	2	4	1	1
M	61	50-64	High School	Employed	Yes	Yes		Psychological and General well-being	Yes		4	3	3	3	3	3	3	1	2	2	3	2	2
F	61	50-64	High School	Employed	No	No	Health problems		No	Health problems	4	3	3	2	3	3	3	2	3	3	3	3	3
F	52	50-64	High School	Employed	Yes	Yes		Psychological and Physical well-being	No	Health problems	4	3	3	2	3	3	3	2	3	2	2	2	2
M	54	50-64	High School	Employed	Yes	Yes		Physical and General well-being	Yes		4	3	3	3	3	3	3	2	3	3	2	3	2
F	61	50-64	High School	Employed	No	No	Psycho-social aspects		No	Psychological aspects	4	4	4	3	4	4	4	3	4	2	3	4	3
F	51	50-64	High School	Employed	Yes	Yes		Psychological and General well-being	Yes		4	2	2	2	2	3	4	2	2	2	3	2	2
F	55	50-64	High School	Employed	Yes	Yes		General well-being	Yes		4	3	4	3	3	3	4	2	3	3	2	3	1
F	52	50-64	High School	Employed	No	Yes		Psychological well-being	No	Socio-Economics problems	3	4	4	2	3	3	3	3	3	2	4	2	2
F	61	50-64	High School	Employed	No	No	Psycho-social aspects		No	Psychological aspects	4	2	3	1	3	3	4	1	3	3	2	3	2
F	52	50-64	High School	Employed	No	Yes		Psychological well-being	No	Socio-Economics problems	3	3	2	2	3	3	3	2	2	2	3	3	2
F	52	50-64	High School	Employed	Yes	Yes		Psychological well-being	Yes		4	3	4	2	3	3	4	2	4	2	3	2	2
F	50	50-64	High School	Employed	No	No	Psycho-social aspects		No	Psychological aspects	4	3	3	2	2	3	4	2	3	2	3	3	2
F	56	50-64	High School	Employed	Yes	Yes		General well-being	Yes		4	3	3	2	3	3	4	2	4	3	4	2	2
M	53	50-64	High School	Employed	Yes	Yes		Physical and General well-being	Yes		4	4	4	2	3	4	3	2	3	2	2	2	1
F	52	50-64	High School	Employed	Yes	Yes		General well-being	Yes		4	3	3	3	4	4	4	1	3	2	2	2	2
F	56	50-64	High School	Employed	No	No	Psycho-social aspects		No	Psychological aspects	3	3	3	2	3	4	4	1	1	1	3	2	1
F	55	50-64	High School	Employed	Yes	Yes		Psychological and General well-being	Yes		4	3	4	3	3	4	4	4	3	2	4	4	2
F	64	50-64	Degree	Retired	No	No	Psycho-social aspects		No	Psychological aspects	3	3	3	1	2	3	4	2	3	1	3	3	2
M	56	50-64	Degree	Employed	Yes	No	Covid19 problems		Yes		4	3	4	1	2	3	3	2	3	2	2	2	1
M	57	50-64	High School	Employed	Yes	Yes		Psychological well-being	No	Health problems	3	4	4	2	4	4	4	2	4	2	4	2	2
F	59	50-64	Master's Degree	Employed	Yes	Yes		Psychological well-being	No	Psychological aspects	4	3	4	2	4	3	4	2	4	1	2	1	2
M	61	50-64	High School	Employed	Yes	Yes		Psychological and General well-being	Yes		4	3	3	3	3	3	3	3	3	3	2	3	2
M	51	50-64	High School	Employed	No	No	Psycho-social aspects		Yes		4	2	2	2	2	3	3	2	2	3	2	2	2
F	51	50-64	High School	Employed	No	No	Psycho-social aspects		No	Psychological aspects	3	3	3	1	2	3	2	2	3	3	4	2	2
F	58	50-64	Degree	Employed	Yes	No	Psycho-social aspects		No	Environmental problems	4	3	3	2	3	4	4	2	4	1	2	2	2
F	50	50-64	High School	Employed	Yes	Yes		Psychological well-being	Yes		4	3	4	3	3	3	3	2	3	2	3	3	2
F	59	50-64	High School	Employed	No	Yes		Psychological and General well-being	No	Socio-Economics problems	3	3	3	3	2	3	3	2	2	3	2	3	2
M	56	50-64	High School	Employed	No	No	Health problems		No	Health problems	4	3	3	2	2	3	3	1	4	3	3	2	2
F	53	50-64	Secondary school	Unemployed	Yes	No	Psycho-social aspects		No	Psychological aspects	4	3	2	2	3	3	3	2	3	2	1	1	2
M	58	50-64	High School	Employed	Yes	No	Tecnological problems		Yes		4	3	2	2	3	4	4	2	4	3	3	2	2
M	63	50-64	High School	Retired	Yes	Yes		Physical and General well-being	Yes		4	3	3	2	2	4	4	1	4	1	4	4	1
M	51	50-64	Degree	Freelance	No	No	Psycho-social aspects		No	Psychological aspects	3	4	4	2	4	4	4	1	4	1	4	2	1
F	50	50-64	Degree	Freelance	No	No	Covid19 problems		No	Psychological aspects	4	3	4	1	3	4	3	1	3	2	4	2	2
F	57	50-64	High School	Employed	No	No	Psycho-social aspects		No	Psychological aspects	4	2	3	2	2	3	4	2	2	3	2	2	1
F	53	50-64	High School	Employed	Yes	Yes		Physical and General well-being	No	Psychological aspects	4	3	3	2	3	4	3	2	3	2	3	2	3
F	60	50-64	High School	Employed	Yes	Yes		Physical and General well-being	No	Psychological aspects	3	3	3	2	3	4	4	2	3	1	4	2	2
F	53	50-64	High School	Employed	Yes	Yes		Psychological and Physical well-being	Yes		4	4	4	4	3	4	3	2	4	3	1	2	2
F	56	50-64	High School	Employed	Yes	No	Psycho-social aspects		No	Psychological aspects	4	2	4	1	3	3	4	4	3	4	4	4	2
F	53	50-64	Degree	Employed	Yes	No	Tecnological problems		Yes		4	3	3	1	2	3	4	1	3	3	3	3	2
F	58	50-64	High School	Employed	No	No	Psycho-social aspects		No	Psychological aspects	4	4	4	2	1	4	4	1	4	1	4	1	1
F	50	50-64	High School	Other	No	Yes		Psychological well-being	No	Psychological aspects	4	3	2	2	2	3	4	2	2	2	1	2	1
F	50	50-64	Degree	Employed	Yes	Yes		Psychological and General well-being	Yes		4	4	3	2	3	4	4	2	3	2	3	2	1
F	55	50-64	High School	Employed	Yes	Yes		Psychological and Physical well-being	Yes		4	4	4	3	4	4	4	2	4	2	4	3	3
F	60	50-64	High School	Employed	No	No	Environmental problems		Yes		4	3	3	2	3	3	3	2	3	1	3	3	2
F	55	50-64	High School	Employed	Yes	Yes		General well-being	Yes		4	3	3	2	3	3	3	3	3	2	3	2	2
F	54	50-64	High School	Employed	Yes	Yes		Psychological well-being	Yes		4	3	3	3	2	3	4	3	2	2	3	3	2
F	60	50-64	Degree	Employed	No	No	Psycho-social aspects		No	Psychological aspects	4	3	1	2	3	3	3	1	1	1	1	1	1
M	59	50-64	Degree	Employed	No	No	Covid19 problems		Yes		3	4	4	2	3	4	4	3	2	3	4	3	3
F	51	50-64	High School	Employed	No	No	Psycho-social aspects		No	Psychological aspects	4	2	4	2	3	3	4	1	3	3	3	2	1
M	64	50-64	PhD	Retired	Yes	Yes		Psychological and General well-being	Yes		4	3	3	2	3	3	3	2	3	1	4	2	2
F	51	50-64	Master's Degree	Employed	No	Yes		General well-being	Yes		4	2	3	2	3	4	4	2	4	1	3	2	1
F	61	50-64	Degree	Employed	Yes	Yes		Psychological well-being	Yes		4	3	4	2	3	4	4	1	3	1	4	2	2
F	52	50-64	Secondary school	Employed	Yes	Yes		Psychological and General well-being	No	Socio-Economics problems	4	4	4	2	3	4	4	2	4	2	3	2	2
M	54	50-64	Secondary school	Employed	Yes	Yes		Psychological and General well-being	Yes		4	4	4	2	4	4	4	2	4	2	3	2	1
F	54	50-64	High School	Employed	Yes	Yes		General well-being	Yes		4	2	3	2	3	3	4	1	3	2	3	2	1
F	51	50-64	High School	Employed	Yes	No	Psycho-social aspects		No	Environmental problems	3	2	3	2	2	3	4	2	3	2	3	2	2
F	55	50-64	High School	Employed	No	Yes		Psychological and Physical well-being	Yes		3	3	4	3	3	3	3	1	4	2	4	2	1
F	63	50-64	High School	Retired	No	No	Health problems		No	Health problems	3	2	2	2	2	2	3	2	2	3	2	2	3
F	62	50-64	Degree	Employed	Yes	Yes		Psychological and Physical well-being	Yes		4	2	4	3	3	3	3	2	3	2	3	4	3
F	58	50-64	Secondary school	Employed	Yes	Yes		Psychological well-being	Yes		4	3	2	2	3	3	4	1	2	2	3	3	2
F	53	50-64	Degree	Employed	Yes	Yes		Psychological and Physical well-being	Yes		4	3	4	1	4	4	4	1	4	1	4	3	2
F	55	50-64	PhD	Employed	No	No	Psycho-social aspects		No	Psychological aspects	4	3	4	2	3	3	3	2	3	3	4	3	3
F	58	50-64	Master's Degree	Employed	Yes	Yes		Psychological well-being	No	Psychological aspects	4	3	3	3	3	3	3	3	3	1	3	2	2
F	55	50-64	PhD	Employed	Yes	Yes		Psychological and Physical well-being	Yes		4	3	3	3	3	3	4	2	3	2	2	2	2
F	54	50-64	Secondary school	Employed	Yes	No	Health problems		No	Health problems	4	3	3	2	2	3	3	2	3	3	3	2	2
M	55	50-64	Master's Degree	Employed	Yes	Yes		Psychological well-being	Yes		3	3	3	2	3	4	3	2	3	3	3	2	2
M	56	50-64	High School	Employed	Yes	Yes		Psychological well-being	Yes		4	4	4	1	3	3	4	1	3	2	2	1	1
F	55	50-64	Degree	Employed	Yes	Yes		General well-being	Yes		4	4	4	3	3	4	4	2	3	3	2	2	3
M	61	50-64	Degree	Freelance	Yes	No	Psycho-social aspects		Yes		4	3	3	3	3	3	4	2	3	2	3	2	2
M	53	50-64	High School	Freelance	No	No	Psycho-social aspects		No	Psychological aspects	1	1	2	2	2	2	2	2	2	2	2	2	2
F	54	50-64	High School	Freelance	Yes	Yes		Psychological and General well-being	Yes		3	3	3	2	3	3	4	2	3	3	3	3	2
F	61	50-64	High School	Employed	Yes	No	Psycho-social aspects		No	Psychological aspects	4	2	3	2	2	3	4	2	3	3	3	2	2
F	59	50-64	High School	Freelance	Yes	Yes		Psychological and Physical well-being	Yes		4	3	3	3	4	3	4	1	3	2	2	2	2
M	59	50-64	High School	Freelance	Yes	Yes		Psychological well-being	Yes		3	3	3	2	3	3	3	2	3	3	3	2	2
F	54	50-64	High School	Employed	No	No	Psycho-social aspects		No	Psychological aspects	4	2	2	2	3	3	4	2	2	2	2	2	2
F	60	50-64	High School	Employed	Yes	No	Health problems		No	Psychological aspects	4	4	4	1	3	4	4	1	3	1	4	2	1
F	53	50-64	High School	Employed	Yes	Yes		Psychological and General well-being	Yes		4	4	2	2	4	4	4	2	2	1	3	4	1
F	57	50-64	PhD	Employed	Yes	Yes		Psychological and Physical well-being	Yes		4	4	4	3	4	4	4	4	4	3	4	3	3
F	62	50-64	High School	Employed	No	No	Psycho-social aspects		No	Psychological aspects	3	2	2	1	3	3	3	2	4	1	2	3	3
F	52	50-64	High School	Employed	Yes	Yes		Psychological well-being	Yes		4	4	3	2	3	3	4	2	3	1	2	2	1
F	52	50-64	High School	Employed	Yes	Yes		General well-being	Yes		4	3	3	3	4	4	4	1	3	2	2	2	2
F	64	50-64	High School	Retired	Yes	No	Covid19 problems		No	Covid19 problems	3	3	3	2	3	3	3	2	3	2	3	3	2
F	57	50-64	High School	Employed	No	Yes		Psychological and General well-being	No	Socio-Economics problems	4	2	3	2	2	2	4	1	3	1	2	2	3
F	55	50-64	Degree	Employed	Yes	Yes		Psychological well-being	Yes		4	3	4	3	3	4	4	2	3	2	3	3	2
M	54	50-64	Master's Degree	Employed	No	No	Psycho-social aspects		No	Psychological aspects	3	1	2	2	1	2	2	2	1	3	2	2	1
F	58	50-64	Secondary school	Employed	Yes	No	Psycho-social aspects		No	Psychological aspects	4	3	4	2	4	4	4	2	4	2	3	2	3
M	56	50-64	High School	Employed	No	No	Health problems		No	Health problems	4	3	3	2	2	3	3	1	4	3	3	2	2
F	57	50-64	High School	Employed	Yes	Yes		Psychological and General well-being	Yes		4	3	3	3	3	3	4	2	2	2	4	2	2
M	59	50-64	High School	Employed	Yes	No	Psycho-social aspects		No	Psychological aspects	3	1	2	2	2	1	3	3	2	1	2	1	3
F	59	50-64	High School	Employed	Yes	Yes		Psychological and General well-being	No	Socio-Economics problems	4	3	3	2	3	3	4	2	3	3	2	3	2
F	63	50-64	Secondary school	Homemade	No	Yes		Physical and General well-being	Yes		4	3	4	2	3	4	4	2	4	2	3	1	2
F	59	50-64	Secondary school	Employed	Yes	No	Psycho-social aspects		No	Psychological aspects	4	3	4	1	3	3	4	1	3	1	2	1	1
F	59	50-64	High School	Freelance	Yes	Yes		Psychological well-being	Yes		4	3	3	3	4	4	4	2	4	2	4	2	2
F	58	50-64	High School	Freelance	No	Yes		Psychological and General well-being	No	Socio-Economics problems	3	2	2	2	2	3	3	2	3	3	2	3	2
F	55	50-64	High School	Freelance	Yes	Yes		Psychological and General well-being	Yes		4	4	4	3	3	4	4	1	4	1	4	2	2
F	56	50-64	Secondary school	Freelance	No	No	Psycho-social aspects		No	Psychological aspects	4	4	4	2	4	4	4	1	4	1	3	3	1
F	56	50-64	High School	Freelance	Yes	Yes		General well-being	Yes		4	3	3	2	3	3	4	1	3	2	3	3	3
M	53	50-64	High School	Freelance	Yes	Yes		Physical and General well-being	Yes		4	3	4	2	4	4	4	2	4	2	3	3	1
F	54	50-64	Degree	Freelance	No	No	Psycho-social aspects		No	Psychological aspects	4	3	3	2	3	4	4	2	3	2	1	3	1
F	56	50-64	Degree	Freelance	Yes	Yes		Psychological and General well-being	Yes		4	3	3	2	3	4	4	2	3	2	3	3	2
F	56	50-64	High School	Employed	Yes	No	Psycho-social aspects		No	Psychological aspects	4	3	3	2	3	3	3	2	3	3	3	2	2
F	60	50-64	High School	Freelance	Yes	Yes		Physical and General well-being	Yes		2	3	3	2	4	4	4	2	3	3	4	2	2
F	55	50-64	Secondary school	Freelance	No	Yes		Psychological and Physical well-being	No	Psychological aspects	4	4	4	3	3	4	4	2	4	1	4	3	3
F	63	50-64	Secondary school	Homemade	Yes	No	Environmental problems		No	Covid19 problems	4	3	3	2	3	4	4	1	3	2	2	2	2
F	58	50-64	Degree	Freelance	Yes	Yes		Psychological well-being	Yes		4	4	4	4	4	4	4	1	3	2	3	3	1
F	55	50-64	Degree	Freelance	Yes	No	Psycho-social aspects		No	Psychological aspects	4	4	3	2	2	3	3	2	3	2	2	3	2
F	57	50-64	Secondary school	Freelance	No	Yes		Psychological and Physical well-being	No	Environmental problems	3	2	3	3	3	3	3	2	3	2	2	3	2
F	50	50-64	High School	Freelance	No	Yes		General well-being	No	Psychological aspects	4	3	2	2	3	4	4	2	2	1	3	2	1
F	53	50-64	High School	Freelance	Yes	Yes		Psychological and General well-being	Yes		4	3	3	1	3	3	4	2	4	1	4	1	1
F	50	50-64	High School	Freelance	Yes	No	Psycho-social aspects		Yes		4	3	3	1	2	4	3	3	3	2	3	2	2
M	58	50-64	High School	Freelance	Yes	Yes		Psychological and General well-being	Yes		4	3	3	3	3	3	4	2	3	1	2	1	1
F	53	50-64	Master's Degree	Freelance	No	No	Psycho-social aspects		No	Health problems	4	1	4	1	2	3	4	2	4	1	3	2	2
F	55	50-64	Master's Degree	Employed	Yes	Yes		Physical and General well-being	Yes		4	4	3	2	3	3	3	1	2	3	2	1	1
F	52	50-64	Secondary school	Employed	Yes	Yes		Psychological well-being	Yes		4	4	4	3	3	3	4	1	3	2	3	3	2
M	53	50-64	Master's Degree	Employed	Yes	Yes		Physical and General well-being	Yes		4	3	4	2	3	3	4	1	3	2	3	3	2
F	55	50-64	Master's Degree	Employed	Yes	Yes		Psychological and General well-being	Yes		4	3	3	2	3	3	3	2	3	2	3	3	2
F	56	50-64	PhD	Employed	Yes	No	Covid19 problems		No	Covid19 problems	4	3	3	2	4	4	4	1	3	2	3	2	2
F	52	50-64	Secondary school	Employed	No	No	Psycho-social aspects		No	Psychological aspects	3	2	3	2	2	2	2	3	3	3	2	3	3
F	57	50-64	Secondary school	Employed	Yes	Yes		General well-being	Yes		4	3	3	2	2	3	3	1	3	2	3	2	2
F	52	50-64	High School	Employed	Yes	Yes		Psychological and General well-being	Yes		4	3	4	2	4	4	4	2	4	3	3	2	2
F	53	50-64	High School	Employed	Yes	No	Psycho-social aspects		Yes		4	3	4	1	3	3	3	2	2	3	2	3	3
F	51	50-64	High School	Employed	No	No	Psycho-social aspects		Yes		4	4	3	1	3	3	4	1	2	1	2	1	1
M	54	50-64	High School	Employed	Yes	Yes		Psychological and General well-being	Yes		4	3	2	3	3	4	3	2	2	3	3	3	2
M	60	50-64	Secondary school	Employed	Yes	Yes		Psychological well-being	Yes		4	4	4	2	3	3	4	2	3	2	3	3	2
F	64	50-64	Secondary school	Retired	No	No	Psycho-social aspects		No	Psychological aspects	4	3	3	2	3	2	2	2	3	4	2	2	2
F	57	50-64	High School	Employed	No	Yes		General well-being	Yes		4	3	2	2	3	3	3	2	3	3	3	2	2
F	53	50-64	High School	Employed	Yes	No	Environmental problems		No	Environmental problems	4	4	4	1	4	4	4	2	2	2	2	1	1
F	55	50-64	High School	Employed	Yes	Yes		Psychological and Physical well-being	Yes		4	3	3	3	3	3	3	2	3	3	2	2	2
M	61	50-64	Degree	Employed	No	No	Psycho-social aspects		No	Psychological aspects	3	3	3	2	3	3	3	2	3	3	2	2	2
F	53	50-64	High School	Employed	Yes	Yes		Physical and General well-being	Yes		4	3	3	4	1	2	1	2	2	3	1	3	2
F	63	50-64	High School	Retired	No	Yes		Psychological well-being	No	Socio-Economics problems	4	1	1	3	1	3	3	4	4	1	3	1	2
F	58	50-64	High School	Employed	Yes	Yes		Psychological well-being	Yes		4	3	3	2	3	3	4	2	3	2	3	3	2
M	60	50-64	Degree	Employed	Yes	No	Psycho-social aspects		Yes		4	4	4	2	4	4	4	1	3	2	3	2	2
M	55	50-64	Degree	Employed	No	Yes		General well-being	No	Psychological aspects	4	2	3	2	3	3	3	2	3	1	4	2	1
F	59	50-64	High School	Employed	Yes	Yes		Physical and General well-being	Yes		4	3	3	3	3	3	2	2	3	2	2	3	2
M	52	50-64	High School	Employed	Yes	No	Environmental problems		Yes		3	2	2	2	2	3	3	2	2	2	1	3	2
F	56	50-64	High School	Employed	Yes	No	Psycho-social aspects		No	Psychological aspects	4	3	3	2	3	4	4	3	3	3	3	1	2
F	52	50-64	High School	Employed	Yes	No	Environmental problems		No	Covid19 problems	4	4	4	2	4	4	4	1	4	1	2	2	1
F	62	50-64	High School	Employed	Yes	No	Psycho-social aspects		No	Covid19 problems	4	2	2	3	2	2	2	1	2	2	3	3	2
F	58	50-64	Degree	Employed	Yes	Yes		Psychological and General well-being	Yes		4	4	4	3	4	4	4	2	3	2	3	3	2
F	57	50-64	Degree	Employed	Yes	Yes		Psychological and General well-being	Yes		4	3	3	3	3	4	3	2	4	2	2	4	2
M	54	50-64	High School	Employed	Yes	Yes		Psychological and General well-being	Yes		4	3	3	2	2	3	3	2	2	2	3	2	3
F	57	50-64	High School	Employed	Yes	Yes		General well-being	Yes		4	3	3	2	3	3	3	2	3	2	1	2	1
M	58	50-64	High School	Employed	No	No	Psycho-social aspects		No	Socio-Economics problems	3	2	2	3	1	2	2	3	1	3	1	3	3
F	62	50-64	Secondary school	Employed	Yes	Yes		Psychological well-being	Yes		4	2	2	3	2	3	4	1	2	2	3	3	2
M	57	50-64	Master's Degree	Employed	Yes	Yes		Psychological and General well-being	Yes		4	3	3	2	2	3	3	2	3	2	2	2	2
F	52	50-64	Master's Degree	Employed	Yes	Yes		Psychological and General well-being	Yes		4	3	4	3	3	4	3	2	3	1	1	1	1
F	54	50-64	Degree	Employed	Yes	Yes		Psychological and General well-being	Yes		4	4	4	3	3	4	4	2	3	1	3	2	1
F	54	50-64	Degree	Employed	Yes	No	Psycho-social aspects		No	Covid19 problems	4	3	3	2	3	3	3	2	3	3	2	2	2
F	57	50-64	Secondary school	Employed	Yes	Yes		Psychological and General well-being	Yes		4	4	4	3	4	4	4	2	3	1	3	3	2
M	51	50-64	High School	Employed	Yes	Yes		Psychological and General well-being	Yes		4	3	3	2	3	4	4	2	3	2	2	3	1
F	61	50-64	High School	Employed	Yes	No	Psycho-social aspects		No	Covid19 problems	4	3	3	1	3	4	2	2	2	2	1	1	1
F	61	50-64	High School	Employed	Yes	Yes		Psychological and General well-being	Yes		4	4	3	2	3	3	3	1	3	2	3	2	1
F	59	50-64	High School	Employed	Yes	Yes		Psychological and General well-being	Yes		4	4	4	1	4	4	4	1	1	1	4	4	3
F	60	50-64	Degree	Employed	Yes	Yes		Psychological and General well-being	Yes		4	4	4	2	3	3	3	2	3	2	2	2	2
M	56	50-64	Secondary school	Employed	Yes	No	Psycho-social aspects		No	Psychological aspects	3	3	3	1	3	3	4	1	4	2	1	1	1
F	51	50-64	Master's Degree	Employed	Yes	Yes		Psychological well-being	Yes		4	4	3	2	3	3	3	2	3	2	3	2	2
M	59	50-64	Master's Degree	Employed	Yes	Yes		Physical and General well-being	Yes		4	3	3	2	3	3	3	2	3	3	2	1	1
M	53	50-64	Secondary school	Employed	Yes	Yes		Psychological and General well-being	No	Psychological aspects	4	2	3	2	2	3	3	2	2	2	3	3	2
M	56	50-64	High School	Employed	No	No	Psycho-social aspects		No	Psychological aspects	3	3	2	2	3	2	3	2	2	2	2	2	2
F	54	50-64	High School	Employed	Yes	Yes		Psychological well-being	Yes		3	3	3	2	3	3	4	1	3	2	3	2	1
F	61	50-64	High School	Employed	Yes	Yes		General well-being	No	Environmental problems	4	3	3	2	3	3	3	2	3	2	2	3	4
F	57	50-64	Degree	Employed	No	No	Psycho-social aspects		No	Psychological aspects	3	1	2	3	2	2	2	2	2	2	1	3	2
F	50	50-64	Degree	Employed	No	No	Psycho-social aspects		No	Psychological aspects	4	3	3	3	3	3	3	2	2	2	2	2	1
F	60	50-64	High School	Employed	Yes	Yes		Psychological well-being	Yes		4	3	3	2	3	3	3	2	3	2	2	2	2
F	52	50-64	High School	Employed	Yes	Yes		Psychological well-being	Yes		4	2	2	2	2	3	3	2	3	1	2	2	2
F	57	50-64	High School	Employed	Yes	Yes		Psychological and General well-being	No	Psychological aspects	4	3	4	2	4	4	4	1	4	2	2	3	2
F	54	50-64	High School	Employed	No	Yes		Psychological well-being	No	Psychological aspects	3	3	3	3	2	2	2	2	2	3	3	2	2
M	59	50-64	High School	Employed	Yes	Yes		Psychological and General well-being	Yes		4	3	4	3	2	3	3	2	3	2	2	3	2
M	63	50-64	High School	Retired	No	No	Health problems		No	Health problems	4	3	3	2	3	4	4	2	4	1	2	2	2
F	52	50-64	High School	Employed	No	No	Psycho-social aspects		No	Psychological aspects	4	3	4	2	3	3	4	2	4	1	3	1	1
F	54	50-64	Degree	Employed	Yes	Yes		Psychological well-being	Yes		4	3	4	2	3	3	4	2	4	1	3	3	1
M	53	50-64	High School	Employed	Yes	No	Environmental problems		Yes		4	4	2	1	3	4	4	2	3	2	3	2	2
F	54	50-64	Secondary school	Employed	Yes	Yes		Psychological and General well-being	Yes		3	2	3	3	3	3	3	2	3	2	2	2	2
F	63	50-64	High School	Retired	Yes	No	Health problems		No	Psychological aspects	4	3	3	2	3	3	4	2	2	2	3	2	2
F	60	50-64	High School	Employed	No	Yes		Physical and General well-being	Yes		4	4	4	3	4	4	4	2	4	1	4	3	3
F	53	50-64	High School	Employed	Yes	Yes		Psychological and General well-being	Yes		4	4	4	3	3	3	4	1	3	2	3	3	1
M	52	50-64	High School	Employed	Yes	No	Psycho-social aspects		No	Covid19 problems	4	3	3	1	2	4	4	1	3	3	2	2	2
M	52	50-64	Secondary school	Employed	Yes	Yes		Psychological and General well-being	Yes		4	4	4	2	4	4	4	2	2	1	3	3	1
F	75	>64	Secondary school	Retired	Yes	No	Psycho-social aspects		Yes		3	3	4	1	3	3	4	2	3	2	3	2	1
F	65	>64	Master's Degree	Retired	Yes	Yes		General well-being	Yes		3	2	2	2	2	2	2	2	2	3	2	2	2
M	70	>64	Secondary school	Retired	Yes	Yes		Psychological and General well-being	Yes		3	2	3	2	3	3	3	2	2	2	2	2	1
F	65	>64	Secondary school	Retired	Yes	No	Tecnological problems		Yes		3	2	2	2	1	3	2	1	2	4	2	2	1
M	65	>64	High School	Retired	Yes	Yes		General well-being	No	Covid19 problems	3	3	3	2	3	3	4	2	3	3	2	1	2
M	68	>64	High School	Retired	No	Yes		Psychological and General well-being	No	Psychological aspects	3	3	3	2	2	2	3	1	3	2	1	3	2
M	69	>64	High School	Retired	Yes	Yes		General well-being	Yes		3	2	2	3	2	2	3	2	2	2	2	2	3
F	69	>64	Secondary school	Retired	Yes	No	Environmental problems		Yes		4	2	2	1	3	3	3	2	2	2	3	2	2
F	71	>64	Secondary school	Retired	Yes	No	Psycho-social aspects		No	Covid19 problems	4	3	3	1	2	3	3	2	2	1	2	1	1
M	75	>64	Secondary school	Retired	No	No	Psycho-social aspects		No	Psychological aspects	3	1	1	1	1	1	1	3	1	1	2	2	2
F	70	>64	PhD	Retired	Yes	Yes		Psychological and General well-being	Yes		4	1	1	4	2	1	1	1	1	1	3	2	2
F	65	>64	Degree	Retired	Yes	No	Psycho-social aspects		No	Psychological aspects	4	3	3	1	3	3	4	2	3	2	3	2	2
F	69	>64	Degree	Retired	Yes	Yes		General well-being	Yes		3	3	3	3	2	4	4	3	3	2	3	2	2
F	73	>64	Primary School	Retired	No	No	Psycho-social aspects		No	Psychological aspects	4	3	3	3	3	3	3	2	3	3	2	2	2
M	66	>64	Master's Degree	Retired	Yes	No	Environmental problems		No	Environmental problems	3	2	3	2	2	3	4	2	3	2	2	1	2
F	84	>64	Secondary school	Retired	Yes	Yes		Psychological and General well-being	Yes		4	4	4	4	4	3	1	3	4	1	2	3	2
F	68	>64	Secondary school	Retired	Yes	Yes		Psychological and General well-being	Yes		4	3	4	3	3	4	4	1	4	2	3	3	2
F	71	>64	Secondary school	Retired	Yes	Yes		Psychological and General well-being	Yes		4	4	4	1	4	4	4	1	4	1	3	3	1
M	70	>64	Secondary school	Retired	Yes	No	Psycho-social aspects		No	Psychological aspects	4	3	2	2	3	3	3	2	3	2	3	2	2
F	68	>64	Degree	Retired	Yes	No	Health problems		No	Health problems	4	3	3	2	3	3	3	2	3	2	1	3	3
F	68	>64	Degree	Retired	Yes	No	Psycho-social aspects		No	Health problems	4	3	3	2	3	4	4	1	3	1	4	2	1
M	74	>64	Secondary school	Retired	Yes	Yes		Psychological and General well-being	Yes		4	3	3	3	3	3	3	2	3	3	2	1	1
F	72	>64	Primary School	Retired	Yes	Yes		General well-being	Yes		3	4	4	2	2	3	3	2	3	2	4	3	2
F	67	>64	Master's Degree	Retired	Yes	Yes		General well-being	Yes		4	4	3	2	3	4	4	2	3	2	3	2	2
F	69	>64	Secondary school	Retired	Yes	No	Psycho-social aspects		Yes		4	3	3	2	3	3	4	2	3	2	2	2	2
F	73	>64	Secondary school	Retired	Yes	Yes		Psychological and General well-being	No	Psychological aspects	4	3	3	2	3	3	3	2	3	2	2	2	2
F	67	>64	Secondary school	Retired	Yes	Yes		Psychological and General well-being	Yes		4	3	4	3	4	4	4	2	4	3	3	2	2
M	78	>64	Secondary school	Retired	No	Yes		Physical and General well-being	No	Psychological aspects	4	2	2	2	2	2	2	2	1	1	3	1	1
F	65	>64	Degree	Retired	Yes	No	Psycho-social aspects		No	Psychological aspects	3	2	2	3	2	3	4	2	3	3	3	3	3
F	67	>64	Degree	Retired	Yes	Yes		Psychological well-being	Yes		4	4	4	4	4	4	4	2	4	2	3	3	2
F	71	>64	Master's Degree	Retired	Yes	No	Psycho-social aspects		Yes		4	4	4	1	3	4	4	1	3	1	3	2	1
F	68	>64	Primary School	Retired	Yes	Yes		Psychological and General well-being	Yes		4	3	3	3	3	4	4	2	3	2	3	4	2
M	67	>64	Secondary school	Retired	Yes	Yes		General well-being	Yes		4	3	3	3	3	3	2	3	3	3	1	2	2
F	65	>64	Secondary school	Retired	No	No	Psycho-social aspects		No	Psychological aspects	4	3	3	2	3	3	3	2	3	3	3	2	2
M	83	>64	Secondary school	Retired	No	No	Psycho-social aspects		No	Psychological aspects	3	3	3	2	3	3	4	2	3	2	3	2	2
F	75	>64	Primary School	Retired	No	No	Health problems		No	Psychological aspects	4	3	3	2	3	4	4	2	3	2	3	2	2
F	65	>64	Secondary school	Retired	Yes	Yes		Psychological and General well-being	Yes		4	3	4	3	3	3	4	2	4	1	3	3	1
F	72	>64	Secondary school	Retired	No	No	Psycho-social aspects		No	Psychological aspects	4	4	3	2	3	4	4	1	4	2	3	3	3
F	68	>64	Degree	Retired	Yes	No	Environmental problems		No	Covid19 problems	4	4	4	1	3	4	4	3	4	1	3	2	2
M	67	>64	Secondary school	Retired	Yes	Yes		Psychological and General well-being	Yes		3	3	4	3	4	3	4	4	4	2	3	3	2
F	70	>64	High School	Retired	No	No	Psycho-social aspects		No	Psychological aspects	4	4	4	2	4	4	4	2	3	2	1	2	2
F	65	>64	High School	Retired	No	No	Psycho-social aspects		No	Psychological aspects	4	3	3	1	3	3	3	2	3	2	4	3	2
M	68	>64	High School	Retired	Yes	Yes		Psychological and General well-being	Yes		4	3	3	3	3	3	3	2	3	2	3	2	2
F	72	>64	High School	Retired	Yes	Yes		Psychological and General well-being	Yes		4	3	3	2	3	3	3	2	3	2	2	3	2
F	67	>64	High School	Retired	No	Yes		General well-being	No	Psychological aspects	4	3	3	2	3	3	3	2	4	2	2	2	2
F	67	>64	High School	Retired	Yes	Yes		Psychological and General well-being	Yes		4	3	3	3	3	4	4	3	3	3	3	3	2
M	68	>64	Master's Degree	Retired	Yes	Yes		Psychological and General well-being	Yes		4	3	4	3	4	4	4	2	3	2	3	3	2
F	67	>64	Degree	Retired	No	No	Psycho-social aspects		No	Psychological aspects	4	4	3	2	3	3	4	2	3	2	1	3	2
M	65	>64	High School	Retired	No	No	Psycho-social aspects		No	Psychological aspects	3	2	2	3	1	3	3	1	2	2	1	1	2
F	66	>64	Secondary school	Retired	No	No	Psycho-social aspects		No	Psychological aspects	4	3	1	2	2	3	4	2	2	2	3	2	1
M	68	>64	Secondary school	Retired	Yes	Yes		Psychological and General well-being	Yes		4	3	4	2	3	4	4	1	4	2	4	2	2
F	65	>64	Secondary school	Retired	No	Yes		Psychological well-being	No	Psychological aspects	3	3	2	2	1	4	4	2	3	3	2	3	4
F	69	>64	Secondary school	Retired	No	No	Psycho-social aspects		No	Psychological aspects	4	3	3	2	3	4	4	1	3	3	3	2	2
M	66	>64	Master's Degree	Retired	Yes	Yes		General well-being	Yes		4	3	4	3	3	3	3	2	3	3	2	2	2
M	66	>64	High School	Retired	No	No	Psycho-social aspects		No	Health problems	3	2	3	3	2	3	3	2	3	3	3	3	2
F	69	>64	High School	Retired	No	No	Health problems		No	Psychological aspects	4	3	3	2	2	3	3	1	2	2	2	2	1
F	65	>64	Master's Degree	Retired	Yes	Yes		Psychological and General well-being	Yes		4	4	4	3	2	3	3	1	3	3	1	2	2
F	66	>64	High School	Retired	Yes	Yes		Physical and General well-being	Yes		4	4	4	3	3	3	3	2	3	2	3	2	2
M	77	>64	High School	Retired	Yes	Yes		General well-being	Yes		4	3	3	2	3	3	3	2	3	2	3	2	2
M	66	>64	High School	Retired	Yes	Yes		Psychological well-being	No	Psychological aspects	4	3	3	2	3	4	4	2	4	2	3	2	3
F	25	18-39	High School	Student	No	Yes		Psychological well-being	Yes		4	3	3	4	2	3	4	2	2	3	2	3	3
F	25	18-39	High School	Student	Yes	No	Psycho-social aspects		Yes		4	4	4	2	3	4	4	2	3	2	2	2	2
F	25	18-39	High School	Employed	Yes	Yes		Psychological and General well-being	No	Socio-Economics problems	4	4	4	2	4	4	4	2	4	2	3	2	2
F	25	18-39	High School	Student	No	No	Tecnological problems		No	Psychological aspects	4	4	4	1	4	4	4	1	4	1	4	1	1
F	25	18-39	High School	Employed	No	Yes		Psychological and Physical well-being	Yes		4	3	3	2	3	3	4	2	3	3	3	3	2
M	25	18-39	Degree	Employed	Yes	Yes		Psychological and Physical well-being	Yes		4	4	4	3	4	4	4	2	3	2	3	2	2
M	25	18-39	Secondary school	Employed	Yes	Yes		Psychological and Physical well-being	Yes		3	3	2	2	3	3	4	1	2	1	2	2	1
F	25	18-39	Other	Other	Yes	Yes		Psychological and General well-being	Yes		4	4	4	2	3	3	3	2	3	3	3	3	2
F	25	18-39	High School	Student	Yes	Yes		Physical and General well-being	No	Environmental problems	3	4	3	2	2	3	3	1	1	1	3	2	3
F	25	18-39	High School	Student	Yes	Yes		Psychological and Physical well-being	Yes		4	3	1	3	3	4	3	1	1	3	2	3	2
F	25	18-39	High School	Student	No	No	Environmental problems		No	Socio-Economics problems	4	4	3	2	3	3	4	1	3	2	3	2	1
F	25	18-39	High School	Student	Yes	Yes		Psychological and General well-being	Yes		4	4	4	2	4	4	4	2	4	1	3	3	2
F	25	18-39	High School	Student	No	Yes		Psychological and Physical well-being	No	Psychological aspects	4	3	3	3	3	3	3	4	3	3	2	4	2
F	25	18-39	High School	Student	Yes	Yes		Psychological and Physical well-being	Yes		4	2	3	2	3	3	3	2	3	1	3	2	2
M	25	18-39	High School	Student	Yes	Yes		Physical and General well-being	Yes		4	4	4	2	3	4	4	2	3	1	4	2	2
F	25	18-39	High School	Student	Yes	Yes		Psychological and Physical well-being	Yes		4	3	2	3	2	4	4	1	2	1	2	2	2
F	25	18-39	High School	Student	Yes	Yes		Psychological and General well-being	Yes		4	3	4	2	4	4	4	2	4	3	3	3	2
M	25	18-39	High School	Student	Yes	Yes		Physical and General well-being	Yes		4	4	2	3	3	3	3	2	3	2	2	2	2
F	25	18-39	Secondary school	Employed	No	Yes		Psychological and Physical well-being	Yes		3	3	4	3	1	4	4	1	3	2	3	2	1
F	25	18-39	Secondary school	Employed	Yes	No	Psycho-social aspects		Yes		4	4	4	2	3	4	4	2	3	2	2	2	2
M	25	18-39	Other	Other	Yes	Yes		Psychological well-being	Yes		3	3	3	2	3	3	4	2	3	2	3	2	2
F	25	18-39	Secondary school	Employed	No	Yes		Physical well-being	No	Psychological aspects	3	2	2	1	2	3	4	1	3	4	1	3	3
F	25	18-39	Other	Other	Yes	Yes		Psychological and Physical well-being	Yes		4	4	4	2	3	4	3	2	4	3	3	2	2
M	25	18-39	Degree	Employed	Yes	Yes		Psychological and Physical well-being	Yes		4	3	3	2	3	3	3	2	2	2	2	3	2
F	25	18-39	Degree	Student	Yes	Yes		Psychological and Physical well-being	Yes		4	4	4	3	3	3	3	2	3	3	2	3	2
M	25	18-39	Other	Other	Yes	Yes		Physical and General well-being	Yes		4	4	2	3	3	3	3	2	3	2	2	2	2
M	25	18-39	Secondary school	Employed	Yes	Yes		Psychological and General well-being	Yes		4	3	4	2	4	4	4	2	4	2	3	2	1
F	25	18-39	Degree	Employed	Yes	Yes		Psychological well-being	Yes		4	3	3	3	4	4	4	2	4	1	4	3	2
M	25	18-39	Degree	Student	Yes	Yes		Psychological and General well-being	Yes		3	2	3	3	3	2	3	2	3	3	2	3	2
M	25	18-39	Secondary school	Employed	Yes	Yes		Physical and General well-being	Yes		4	4	4	2	3	4	3	2	3	1	2	3	2
F	25	18-39	Other	Other	Yes	Yes		Physical and General well-being	Yes		4	4	4	3	4	4	4	2	4	2	3	4	2
F	25	18-39	Other	Other	No	No	Psycho-social aspects		No	Psychological aspects	4	2	3	1	2	3	3	1	3	2	4	2	1
F	25	18-39	Degree	Student	Yes	Yes		Psychological and General well-being	Yes		4	4	4	3	2	4	4	3	4	3	1	2	2
